# Supplementary material
Source: publisher site journal article supplement (https://www.spandidos-publications.com/7086/downloadSupplementary)
Supplement: Supplementary file 1 [file downloadSupplementary]

## Sheet: celltype_LR_sigmean.cellphone
Table SIII. Ligand and receptor pairs of cytokines and chemokines between various cell types inferred by CellPhoneDB.
interacting_cell	interacting_pair	secreted	receptor_a	receptor_b	means	pvalues	rankValue
cDC2_4|TCells	TNFSF18_TNFRSF18	TRUE	FALSE	TRUE	0.617	0	0.062
Macrophages3|TCells	TNFSF15_TNFRSF25	TRUE	FALSE	TRUE	0.235	0	0.062
cDC2_4|cDC2_4	PTGER3_GHRL	TRUE	TRUE	FALSE	0.121	0	0.062
TCells|cDC2_4	EPHB6_EFNB1	TRUE	TRUE	FALSE	0.101	0.042	0.062
Macrophages5|TCells	CXCL12_CXCR4	TRUE	FALSE	TRUE	0.695	0	0.062
TCells|Macrophages3	CCR8_CCL18	TRUE	TRUE	FALSE	1.335	0	0.062
TCells|Macrophages3	IDE_CCL23	TRUE	TRUE	FALSE	0.117	0.006	0.062
Macrophages5|TCells	CCL4_SLC7A1	TRUE	FALSE	TRUE	0.74	0	0.062
TCells|cDC2_4	LRP6_CKLF	TRUE	TRUE	FALSE	0.585	0	0.062
TCells|TCells	CSF1_SLC7A1	TRUE	FALSE	TRUE	0.135	0	0.062
TCells|TCells	KLRB1_CLEC2D	FALSE	TRUE	TRUE	0.804	0	0.062
TCells|TCells	FGFR2_XPR1	TRUE	TRUE	TRUE	0.127	0	0.062
TCells|cDC2_4	FGFR2_CD83	TRUE	TRUE	TRUE	0.411	0	0.062
TCells|TCells	EFNA1_EPHA4	TRUE	FALSE	TRUE	0.11	0	0.062
TCells|TCells	FGFR2_EPHA4	TRUE	TRUE	TRUE	0.102	0.003	0.062
TCells|TCells	ESAM_ESAM	FALSE	FALSE	FALSE	0.264	0	0.062
TCells|TCells	CD27_CD70	TRUE	TRUE	FALSE	0.522	0	0.062
Macrophages3|cDC2_4	CXCL1_CXCR2	TRUE	FALSE	TRUE	0.366	0	0.062
TCells|cDC2_4	CD200_CD200R1	TRUE	FALSE	TRUE	0.46	0	0.062
TCells|Macrophages3	EGFR_HBEGF	TRUE	TRUE	TRUE	0.298	0	0.062
TCells|TCells	CCL5_CCR4	TRUE	FALSE	TRUE	0.585	0	0.062
Macrophages3|Macrophages3	EPOR_KITLG	TRUE	TRUE	FALSE	0.096	0.009	0.062
cDC2_4|Macrophages5	C5_C5AR2	TRUE	FALSE	TRUE	0.084	0	0.062
TCells|TCells	CADM1_CADM1	FALSE	FALSE	FALSE	0.263	0	0.062
TCells|TCells	BMPR1A_BMPR2_BMP7	TRUE	TRUE	FALSE	0.163	0	0.062
TCells|Macrophages3	KIT_KITLG	TRUE	TRUE	FALSE	0.166	0	0.062
TCells|TCells	CADM1_NECTIN3	FALSE	FALSE	FALSE	0.219	0	0.062
Macrophages3|Macrophages3	IL6_HRH1	TRUE	FALSE	TRUE	0.076	0	0.062
TCells|Macrophages5	TNFRSF8_TNFSF8	FALSE	TRUE	FALSE	0.14	0	0.062
TCells|Macrophages5	EGFR_TGFB1	TRUE	TRUE	FALSE	0.393	0.003	0.062
TCells|cDC2_4	CCR4_CCL17	TRUE	TRUE	FALSE	1.125	0	0.062
TCells|TCells	EGFR_MIF	TRUE	TRUE	FALSE	0.247	0	0.062
cDC2_4|TCells	TNFSF4_TNFRSF4	FALSE	FALSE	TRUE	0.7	0	0.062
TCells|cDC2_4	EGFR_AREG	TRUE	TRUE	FALSE	0.289	0	0.062
TCells|TCells	TIGIT_NECTIN3	FALSE	FALSE	FALSE	0.723	0	0.062
TCells|Macrophages5	LTA_TNFRSF1B	TRUE	FALSE	TRUE	0.605	0	0.125
TCells|TCells	LTA_TNFRSF1B	TRUE	FALSE	TRUE	0.71	0	0.125
TCells|Macrophages3	EGFR_COPA	TRUE	TRUE	FALSE	0.285	0.006	0.125
TCells|Macrophages5	EGFR_COPA	TRUE	TRUE	FALSE	0.286	0.021	0.125
Macrophages3|Macrophages5	DPP4_CXCL12	TRUE	TRUE	FALSE	0.244	0	0.125
TCells|Macrophages5	DPP4_CXCL12	TRUE	TRUE	FALSE	0.171	0	0.125
TCells|Macrophages5	IL15 receptor_IL15	TRUE	TRUE	FALSE	0.417	0	0.125
TCells|cDC2_4	IL15 receptor_IL15	TRUE	TRUE	FALSE	0.447	0	0.125
Macrophages3|Macrophages3	IL6 receptor_IL6	TRUE	TRUE	FALSE	0.217	0	0.125
cDC2_4|Macrophages3	IL6 receptor_IL6	TRUE	TRUE	FALSE	0.198	0	0.125
TCells|Macrophages3	CCL5_ACKR1	TRUE	FALSE	TRUE	0.427	0	0.125
TCells|cDC2_4	CCL5_ACKR1	TRUE	FALSE	TRUE	0.445	0	0.125
TCells|TCells	CXCR3_CCL20	TRUE	TRUE	FALSE	0.312	0	0.125
cDC2_4|TCells	CXCR3_CCL20	TRUE	TRUE	FALSE	0.253	0.018	0.125
Macrophages3|TCells	CD44_FGFR2	TRUE	TRUE	TRUE	0.736	0	0.125
Macrophages5|TCells	CD44_FGFR2	TRUE	TRUE	TRUE	0.778	0	0.125
TCells|Macrophages5	HLA-C_FAM3C	TRUE	TRUE	FALSE	1.51	0	0.125
TCells|TCells	HLA-C_FAM3C	TRUE	TRUE	FALSE	1.483	0	0.125
TCells|TCells	TNF_FAS	TRUE	FALSE	TRUE	0.527	0	0.125
cDC2_4|TCells	TNF_FAS	TRUE	FALSE	TRUE	0.41	0.023	0.125
TCells|Macrophages5	CXADR_FAM3C	TRUE	TRUE	FALSE	0.245	0.003	0.125
TCells|TCells	CXADR_FAM3C	TRUE	TRUE	FALSE	0.218	0	0.125
cDC2_4|Macrophages5	ADGRG5_FAM3C	TRUE	TRUE	FALSE	0.205	0.018	0.125
cDC2_4|TCells	ADGRG5_FAM3C	TRUE	TRUE	FALSE	0.178	0.009	0.125
Macrophages3|Macrophages3	NRP2_SEMA3C	TRUE	TRUE	FALSE	0.409	0	0.125
Macrophages5|Macrophages3	NRP2_SEMA3C	TRUE	TRUE	FALSE	0.35	0	0.125
TCells|Macrophages3	EGFR_TGFA	TRUE	TRUE	FALSE	0.088	0.024	0.125
TCells|cDC2_4	EGFR_TGFA	TRUE	TRUE	FALSE	0.113	0	0.125
Macrophages3|Macrophages3	NRP1_SEMA3A	TRUE	TRUE	FALSE	0.45	0	0.125
Macrophages5|Macrophages3	NRP1_SEMA3A	TRUE	TRUE	FALSE	0.507	0	0.125
Macrophages3|Macrophages3	CCL8_ACKR1	TRUE	FALSE	TRUE	0.214	0	0.125
Macrophages3|cDC2_4	CCL8_ACKR1	TRUE	FALSE	TRUE	0.231	0	0.125
Macrophages3|cDC2_4	NRP1_PGF	TRUE	TRUE	FALSE	0.456	0	0.125
Macrophages5|cDC2_4	NRP1_PGF	TRUE	TRUE	FALSE	0.513	0	0.125
Macrophages3|TCells	SPP1_CCR8	TRUE	FALSE	TRUE	0.883	0	0.125
Macrophages5|TCells	SPP1_CCR8	TRUE	FALSE	TRUE	1.052	0	0.125
Macrophages3|cDC2_4	NRP2_PGF	TRUE	TRUE	FALSE	0.361	0	0.125
Macrophages5|cDC2_4	NRP2_PGF	TRUE	TRUE	FALSE	0.303	0	0.125
Macrophages5|TCells	CXCL12_CXCR3	TRUE	FALSE	TRUE	0.278	0	0.125
Macrophages5|cDC2_4	CXCL12_CXCR3	TRUE	FALSE	TRUE	0.219	0.021	0.125
Macrophages3|Macrophages3	CCR1_CCL8	TRUE	TRUE	FALSE	0.733	0	0.125
Macrophages5|Macrophages3	CCR1_CCL8	TRUE	TRUE	FALSE	0.506	0	0.125
Macrophages5|Macrophages3	CCR2_CCL8	TRUE	TRUE	FALSE	0.247	0	0.125
cDC2_4|Macrophages3	CCR2_CCL8	TRUE	TRUE	FALSE	0.282	0	0.125
TCells|Macrophages3	EPHA4_EFNB1	FALSE	TRUE	FALSE	0.073	0.03	0.125
TCells|cDC2_4	EPHA4_EFNB1	FALSE	TRUE	FALSE	0.087	0.006	0.125
TCells|TCells	CCL22_CCR4	TRUE	FALSE	TRUE	0.34	0.003	0.125
cDC2_4|TCells	CCL22_CCR4	TRUE	FALSE	TRUE	0.676	0	0.125
TCells|Macrophages3	MIF_TNFRSF14	TRUE	FALSE	TRUE	0.461	0	0.125
cDC2_4|Macrophages3	MIF_TNFRSF14	TRUE	FALSE	TRUE	0.405	0.029	0.125
TCells|Macrophages3	VEGFA_EPHB2	TRUE	FALSE	TRUE	0.379	0	0.125
TCells|Macrophages5	VEGFA_EPHB2	TRUE	FALSE	TRUE	0.356	0	0.125
Macrophages3|TCells	TNFSF9_TNFRSF9	TRUE	FALSE	TRUE	0.315	0	0.125
Macrophages5|TCells	TNFSF9_TNFRSF9	TRUE	FALSE	TRUE	0.321	0	0.125
Macrophages3|TCells	PVR_NECTIN3	TRUE	TRUE	FALSE	0.139	0	0.125
cDC2_4|TCells	PVR_NECTIN3	TRUE	TRUE	FALSE	0.121	0.006	0.125
TCells|Macrophages5	FZD6_WNT5A	TRUE	TRUE	FALSE	0.165	0.003	0.125
TCells|cDC2_4	FZD6_WNT5A	TRUE	TRUE	FALSE	0.227	0	0.125
TCells|Macrophages3	TNFSF14_TNFRSF14	TRUE	FALSE	TRUE	0.339	0	0.125
cDC2_4|Macrophages3	TNFSF14_TNFRSF14	TRUE	FALSE	TRUE	0.314	0.015	0.125
Macrophages3|TCells	PVR_TIGIT	TRUE	TRUE	FALSE	0.686	0	0.125
cDC2_4|TCells	PVR_TIGIT	TRUE	TRUE	FALSE	0.668	0	0.125
Macrophages3|Macrophages3	CCR1_CCL23	TRUE	TRUE	FALSE	0.588	0	0.125
Macrophages5|Macrophages3	CCR1_CCL23	TRUE	TRUE	FALSE	0.361	0	0.125
Macrophages3|TCells	PVR_CD226	TRUE	TRUE	TRUE	0.178	0	0.125
cDC2_4|TCells	PVR_CD226	TRUE	TRUE	TRUE	0.16	0	0.125
Macrophages3|cDC2_4	TNFRSF10A_TNFSF10	TRUE	TRUE	FALSE	0.378	0	0.125
TCells|cDC2_4	TNFRSF10A_TNFSF10	TRUE	TRUE	FALSE	0.375	0.003	0.125
Macrophages5|TCells	WNT5A_FZD3	TRUE	FALSE	TRUE	0.154	0.009	0.125
cDC2_4|TCells	WNT5A_FZD3	TRUE	FALSE	TRUE	0.216	0	0.125
Macrophages3|TCells	PVR_CD96	TRUE	TRUE	TRUE	0.455	0	0.125
cDC2_4|TCells	PVR_CD96	TRUE	TRUE	TRUE	0.438	0	0.125
cDC2_4|Macrophages3	WNT5A_FZD5	TRUE	FALSE	TRUE	0.195	0	0.125
cDC2_4|cDC2_4	WNT5A_FZD5	TRUE	FALSE	TRUE	0.191	0	0.125
Macrophages3|TCells	BMP7_SLAMF1	TRUE	FALSE	TRUE	0.358	0	0.125
TCells|TCells	BMP7_SLAMF1	TRUE	FALSE	TRUE	0.418	0	0.125
Macrophages3|TCells	CRTAM_CADM1	FALSE	FALSE	FALSE	0.192	0.006	0.125
Macrophages5|TCells	CRTAM_CADM1	FALSE	FALSE	FALSE	0.185	0.038	0.125
cDC2_4|Macrophages3	C5_C5AR1	TRUE	FALSE	TRUE	0.634	0	0.125
cDC2_4|Macrophages5	C5_C5AR1	TRUE	FALSE	TRUE	0.576	0	0.125
Macrophages3|Macrophages5	MDK_SORL1	TRUE	FALSE	TRUE	0.407	0	0.125
TCells|Macrophages5	MDK_SORL1	TRUE	FALSE	TRUE	0.436	0	0.125
Macrophages3|cDC2_4	CXCL3_CXCR2	TRUE	FALSE	TRUE	0.574	0	0.125
Macrophages5|cDC2_4	CXCL3_CXCR2	TRUE	FALSE	TRUE	0.471	0	0.125
Macrophages3|cDC2_4	ACKR1_CCL17	TRUE	TRUE	FALSE	0.967	0	0.125
cDC2_4|cDC2_4	ACKR1_CCL17	TRUE	TRUE	FALSE	0.984	0	0.125
TCells|cDC2_4	TNFRSF11B_TNFSF10	TRUE	FALSE	FALSE	0.405	0	0.125
cDC2_4|cDC2_4	TNFRSF11B_TNFSF10	TRUE	FALSE	FALSE	0.374	0.011	0.125
TCells|Macrophages3	NCR3_BAG6	FALSE	TRUE	FALSE	0.268	0.003	0.125
TCells|TCells	NCR3_BAG6	FALSE	TRUE	FALSE	0.224	0.012	0.125
Macrophages3|TCells	ACVR1_BMPR2_BMP7	TRUE	TRUE	FALSE	0.142	0.003	0.188
Macrophages5|TCells	ACVR1_BMPR2_BMP7	TRUE	TRUE	FALSE	0.141	0.027	0.188
TCells|TCells	ACVR1_BMPR2_BMP7	TRUE	TRUE	FALSE	0.142	0	0.188
cDC2_4|Macrophages3	CD55_ADGRE5	TRUE	TRUE	TRUE	0.466	0.015	0.188
cDC2_4|TCells	CD55_ADGRE5	TRUE	TRUE	TRUE	0.447	0.015	0.188
cDC2_4|cDC2_4	CD55_ADGRE5	TRUE	TRUE	TRUE	0.507	0	0.188
TCells|Macrophages3	PDCD1_PDCD1LG2	TRUE	TRUE	TRUE	0.299	0	0.188
TCells|Macrophages5	PDCD1_PDCD1LG2	TRUE	TRUE	TRUE	0.262	0	0.188
TCells|cDC2_4	PDCD1_PDCD1LG2	TRUE	TRUE	TRUE	0.251	0	0.188
Macrophages3|Macrophages3	PECAM1_CD38	FALSE	TRUE	TRUE	0.549	0	0.188
Macrophages5|Macrophages3	PECAM1_CD38	FALSE	TRUE	TRUE	0.541	0	0.188
cDC2_4|Macrophages3	PECAM1_CD38	FALSE	TRUE	TRUE	0.374	0.006	0.188
TCells|Macrophages3	PDCD1_CD274	FALSE	TRUE	TRUE	0.292	0	0.188
TCells|Macrophages5	PDCD1_CD274	FALSE	TRUE	TRUE	0.257	0	0.188
TCells|cDC2_4	PDCD1_CD274	FALSE	TRUE	TRUE	0.274	0	0.188
TCells|Macrophages3	CD28_CD86	FALSE	FALSE	TRUE	0.906	0	0.188
TCells|Macrophages5	CD28_CD86	FALSE	FALSE	TRUE	0.931	0	0.188
TCells|cDC2_4	CD28_CD86	FALSE	FALSE	TRUE	1.052	0	0.188
TCells|Macrophages3	CTLA4_CD86	FALSE	FALSE	TRUE	0.963	0	0.188
TCells|Macrophages5	CTLA4_CD86	FALSE	FALSE	TRUE	0.988	0	0.188
TCells|cDC2_4	CTLA4_CD86	FALSE	FALSE	TRUE	1.109	0	0.188
Macrophages3|TCells	CCL4_CCR8	TRUE	FALSE	TRUE	0.642	0.027	0.188
Macrophages5|TCells	CCL4_CCR8	TRUE	FALSE	TRUE	1.024	0	0.188
TCells|TCells	CCL4_CCR8	TRUE	FALSE	TRUE	0.665	0	0.188
Macrophages3|TCells	TIMP1_FGFR2	TRUE	FALSE	TRUE	0.635	0	0.188
Macrophages5|TCells	TIMP1_FGFR2	TRUE	FALSE	TRUE	0.549	0.003	0.188
cDC2_4|TCells	TIMP1_FGFR2	TRUE	FALSE	TRUE	0.548	0.003	0.188
cDC2_4|Macrophages3	IL15_IL15RA	TRUE	FALSE	TRUE	0.138	0.015	0.188
cDC2_4|Macrophages5	IL15_IL15RA	TRUE	FALSE	TRUE	0.139	0.021	0.188
cDC2_4|TCells	IL15_IL15RA	TRUE	FALSE	TRUE	0.12	0.015	0.188
cDC2_4|Macrophages3	CD80_CD274	FALSE	TRUE	TRUE	0.281	0	0.188
cDC2_4|Macrophages5	CD80_CD274	FALSE	TRUE	TRUE	0.246	0	0.188
cDC2_4|cDC2_4	CD80_CD274	FALSE	TRUE	TRUE	0.263	0	0.188
Macrophages3|cDC2_4	APP_FPR2	FALSE	FALSE	TRUE	0.435	0.024	0.188
TCells|cDC2_4	APP_FPR2	FALSE	FALSE	TRUE	0.388	0.039	0.188
cDC2_4|cDC2_4	APP_FPR2	FALSE	FALSE	TRUE	0.424	0.024	0.188
Macrophages3|TCells	TNFSF12_TNFRSF25	TRUE	FALSE	TRUE	0.603	0	0.188
Macrophages5|TCells	TNFSF12_TNFRSF25	TRUE	FALSE	TRUE	0.656	0	0.188
cDC2_4|TCells	TNFSF12_TNFRSF25	TRUE	FALSE	TRUE	0.74	0	0.188
TCells|Macrophages3	EGFR_GRN	TRUE	TRUE	FALSE	1.56	0	0.188
TCells|Macrophages5	EGFR_GRN	TRUE	TRUE	FALSE	1.37	0	0.188
TCells|cDC2_4	EGFR_GRN	TRUE	TRUE	FALSE	1.3	0	0.188
Macrophages3|cDC2_4	CXCL2_CXCR2	TRUE	FALSE	TRUE	0.632	0	0.188
Macrophages5|cDC2_4	CXCL2_CXCR2	TRUE	FALSE	TRUE	0.466	0	0.188
cDC2_4|cDC2_4	CXCL2_CXCR2	TRUE	FALSE	TRUE	0.358	0	0.188
Macrophages5|cDC2_4	WNT5A_FZD2	TRUE	FALSE	TRUE	0.155	0.006	0.188
cDC2_4|Macrophages3	WNT5A_FZD2	TRUE	FALSE	TRUE	0.19	0	0.188
cDC2_4|cDC2_4	WNT5A_FZD2	TRUE	FALSE	TRUE	0.216	0	0.188
Macrophages3|cDC2_4	IL1 receptor_IL1B	TRUE	TRUE	FALSE	0.368	0	0.188
Macrophages5|cDC2_4	IL1 receptor_IL1B	TRUE	TRUE	FALSE	0.394	0	0.188
cDC2_4|cDC2_4	IL1 receptor_IL1B	TRUE	TRUE	FALSE	0.474	0	0.188
Macrophages3|TCells	CD40_CD40LG	TRUE	TRUE	FALSE	0.296	0.009	0.188
Macrophages5|TCells	CD40_CD40LG	TRUE	TRUE	FALSE	0.319	0.003	0.188
cDC2_4|TCells	CD40_CD40LG	TRUE	TRUE	FALSE	0.463	0	0.188
cDC2_4|Macrophages3	WNT5A_ANTXR1	TRUE	FALSE	TRUE	0.183	0	0.188
cDC2_4|Macrophages5	WNT5A_ANTXR1	TRUE	FALSE	TRUE	0.209	0	0.188
cDC2_4|TCells	WNT5A_ANTXR1	TRUE	FALSE	TRUE	0.202	0	0.188
TCells|Macrophages5	TNF_TNFRSF1B	TRUE	FALSE	TRUE	0.585	0.026	0.188
TCells|TCells	TNF_TNFRSF1B	TRUE	FALSE	TRUE	0.69	0	0.188
cDC2_4|TCells	TNF_TNFRSF1B	TRUE	FALSE	TRUE	0.572	0.026	0.188
Macrophages3|Macrophages5	CD72_SEMA4D	FALSE	FALSE	TRUE	0.213	0.041	0.188
Macrophages3|TCells	CD72_SEMA4D	FALSE	FALSE	TRUE	0.231	0	0.188
Macrophages5|TCells	CD72_SEMA4D	FALSE	FALSE	TRUE	0.218	0.003	0.188
Macrophages3|TCells	TNFSF13_FAS	TRUE	FALSE	TRUE	0.353	0	0.188
Macrophages5|TCells	TNFSF13_FAS	TRUE	FALSE	TRUE	0.383	0	0.188
cDC2_4|TCells	TNFSF13_FAS	TRUE	FALSE	TRUE	0.349	0	0.188
TCells|Macrophages3	LTA_TNFRSF1A	TRUE	FALSE	TRUE	0.625	0	0.188
TCells|Macrophages5	LTA_TNFRSF1A	TRUE	FALSE	TRUE	0.688	0	0.188
TCells|cDC2_4	LTA_TNFRSF1A	TRUE	FALSE	TRUE	0.6	0	0.188
Macrophages5|Macrophages5	IL1B_ADRB2	TRUE	FALSE	TRUE	0.246	0.03	0.188
cDC2_4|Macrophages3	IL1B_ADRB2	TRUE	FALSE	TRUE	0.362	0	0.188
cDC2_4|Macrophages5	IL1B_ADRB2	TRUE	FALSE	TRUE	0.455	0	0.188
TCells|Macrophages3	TNF_SEMA4C	TRUE	FALSE	TRUE	0.277	0	0.188
TCells|Macrophages5	TNF_SEMA4C	TRUE	FALSE	TRUE	0.304	0	0.188
TCells|cDC2_4	TNF_SEMA4C	TRUE	FALSE	TRUE	0.379	0	0.188
TCells|Macrophages3	TNF_DAG1	TRUE	FALSE	TRUE	0.276	0	0.188
TCells|TCells	TNF_DAG1	TRUE	FALSE	TRUE	0.296	0	0.188
TCells|cDC2_4	TNF_DAG1	TRUE	FALSE	TRUE	0.28	0	0.188
Macrophages5|Macrophages3	TGFB1_TGFbeta receptor2	TRUE	FALSE	TRUE	0.395	0.036	0.188
Macrophages5|Macrophages5	TGFB1_TGFbeta receptor2	TRUE	FALSE	TRUE	0.394	0.032	0.188
Macrophages5|TCells	TGFB1_TGFbeta receptor2	TRUE	FALSE	TRUE	0.395	0.017	0.188
TCells|Macrophages3	CXCR6_CXCL16	TRUE	TRUE	TRUE	1.034	0	0.188
TCells|Macrophages5	CXCR6_CXCL16	TRUE	TRUE	TRUE	1.078	0	0.188
TCells|cDC2_4	CXCR6_CXCL16	TRUE	TRUE	TRUE	0.932	0	0.188
TCells|Macrophages5	TNF_VSIR	TRUE	FALSE	TRUE	0.569	0	0.188
TCells|TCells	TNF_VSIR	TRUE	FALSE	TRUE	0.466	0.006	0.188
TCells|cDC2_4	TNF_VSIR	TRUE	FALSE	TRUE	0.532	0	0.188
Macrophages3|Macrophages3	PLD2_ARF1	FALSE	FALSE	FALSE	0.753	0.024	0.188
cDC2_4|Macrophages3	PLD2_ARF1	FALSE	FALSE	FALSE	0.768	0.012	0.188
cDC2_4|Macrophages5	PLD2_ARF1	FALSE	FALSE	FALSE	0.764	0.027	0.188
Macrophages3|cDC2_4	PLXNC1_SEMA7A	FALSE	TRUE	FALSE	0.356	0	0.188
Macrophages5|cDC2_4	PLXNC1_SEMA7A	FALSE	TRUE	FALSE	0.348	0	0.188
cDC2_4|cDC2_4	PLXNC1_SEMA7A	FALSE	TRUE	FALSE	0.401	0	0.188
Macrophages3|TCells	ICAM1_ITGAL	FALSE	TRUE	TRUE	0.629	0	0.188
Macrophages5|TCells	ICAM1_ITGAL	FALSE	TRUE	TRUE	0.573	0	0.188
cDC2_4|TCells	ICAM1_ITGAL	FALSE	TRUE	TRUE	0.557	0	0.188
TCells|Macrophages3	IFNG_Type II IFNR	TRUE	FALSE	TRUE	0.464	0	0.188
TCells|Macrophages5	IFNG_Type II IFNR	TRUE	FALSE	TRUE	0.634	0	0.188
TCells|cDC2_4	IFNG_Type II IFNR	TRUE	FALSE	TRUE	0.533	0	0.188
TCells|Macrophages3	TNF_NOTCH1	TRUE	FALSE	TRUE	0.285	0	0.188
TCells|Macrophages5	TNF_NOTCH1	TRUE	FALSE	TRUE	0.294	0	0.188
TCells|cDC2_4	TNF_NOTCH1	TRUE	FALSE	TRUE	0.279	0	0.188
cDC2_4|Macrophages3	TNFSF10_RIPK1	TRUE	FALSE	TRUE	0.383	0.05	0.188
cDC2_4|TCells	TNFSF10_RIPK1	TRUE	FALSE	TRUE	0.421	0.003	0.188
cDC2_4|cDC2_4	TNFSF10_RIPK1	TRUE	FALSE	TRUE	0.399	0.027	0.188
Macrophages3|TCells	NECTIN2_NECTIN3	FALSE	TRUE	FALSE	0.29	0	0.188
Macrophages5|TCells	NECTIN2_NECTIN3	FALSE	TRUE	FALSE	0.269	0	0.188
cDC2_4|TCells	NECTIN2_NECTIN3	FALSE	TRUE	FALSE	0.338	0	0.188
TCells|Macrophages3	LTA_RIPK1	TRUE	FALSE	TRUE	0.326	0	0.25
TCells|Macrophages5	LTA_RIPK1	TRUE	FALSE	TRUE	0.326	0	0.25
TCells|TCells	LTA_RIPK1	TRUE	FALSE	TRUE	0.364	0	0.25
TCells|cDC2_4	LTA_RIPK1	TRUE	FALSE	TRUE	0.343	0	0.25
TCells|Macrophages3	SELL_SELPLG	FALSE	FALSE	TRUE	0.607	0	0.25
TCells|Macrophages5	SELL_SELPLG	FALSE	FALSE	TRUE	0.801	0	0.25
TCells|TCells	SELL_SELPLG	FALSE	FALSE	TRUE	0.649	0	0.25
TCells|cDC2_4	SELL_SELPLG	FALSE	FALSE	TRUE	0.701	0	0.25
TCells|Macrophages3	TNF_RIPK1	TRUE	FALSE	TRUE	0.305	0.005	0.25
TCells|Macrophages5	TNF_RIPK1	TRUE	FALSE	TRUE	0.305	0.021	0.25
TCells|TCells	TNF_RIPK1	TRUE	FALSE	TRUE	0.344	0	0.25
TCells|cDC2_4	TNF_RIPK1	TRUE	FALSE	TRUE	0.322	0	0.25
Macrophages5|Macrophages3	CCL3L1_DPP4	TRUE	FALSE	TRUE	0.548	0	0.25
Macrophages5|Macrophages5	CCL3L1_DPP4	TRUE	FALSE	TRUE	0.434	0	0.25
Macrophages5|TCells	CCL3L1_DPP4	TRUE	FALSE	TRUE	0.475	0	0.25
cDC2_4|Macrophages3	CCL3L1_DPP4	TRUE	FALSE	TRUE	0.3	0.018	0.25
TCells|Macrophages3	CCL22_DPP4	TRUE	FALSE	TRUE	0.298	0.042	0.25
cDC2_4|Macrophages3	CCL22_DPP4	TRUE	FALSE	TRUE	0.633	0	0.25
cDC2_4|Macrophages5	CCL22_DPP4	TRUE	FALSE	TRUE	0.52	0	0.25
cDC2_4|TCells	CCL22_DPP4	TRUE	FALSE	TRUE	0.56	0	0.25
Macrophages5|Macrophages5	HLA-F_LILRB1	TRUE	FALSE	TRUE	0.659	0	0.25
TCells|Macrophages3	HLA-F_LILRB1	TRUE	FALSE	TRUE	0.667	0	0.25
TCells|Macrophages5	HLA-F_LILRB1	TRUE	FALSE	TRUE	0.775	0	0.25
TCells|cDC2_4	HLA-F_LILRB1	TRUE	FALSE	TRUE	0.693	0	0.25
Macrophages3|Macrophages3	CXCL2_DPP4	TRUE	FALSE	TRUE	0.45	0	0.25
Macrophages3|Macrophages5	CXCL2_DPP4	TRUE	FALSE	TRUE	0.337	0	0.25
Macrophages3|TCells	CXCL2_DPP4	TRUE	FALSE	TRUE	0.377	0	0.25
Macrophages5|Macrophages3	CXCL2_DPP4	TRUE	FALSE	TRUE	0.284	0.006	0.25
Macrophages3|TCells	TNF_ICOS	TRUE	FALSE	TRUE	0.462	0.039	0.25
Macrophages5|TCells	TNF_ICOS	TRUE	FALSE	TRUE	0.54	0	0.25
TCells|TCells	TNF_ICOS	TRUE	FALSE	TRUE	0.692	0	0.25
cDC2_4|TCells	TNF_ICOS	TRUE	FALSE	TRUE	0.574	0	0.25
Macrophages3|TCells	CXCL10_CXCR3	TRUE	FALSE	TRUE	0.355	0	0.25
Macrophages3|cDC2_4	CXCL10_CXCR3	TRUE	FALSE	TRUE	0.296	0.023	0.25
cDC2_4|TCells	CXCL10_CXCR3	TRUE	FALSE	TRUE	0.342	0	0.25
cDC2_4|cDC2_4	CXCL10_CXCR3	TRUE	FALSE	TRUE	0.283	0.039	0.25
Macrophages3|cDC2_4	CXCL8_CXCR2	TRUE	FALSE	TRUE	0.545	0	0.25
Macrophages5|cDC2_4	CXCL8_CXCR2	TRUE	FALSE	TRUE	0.554	0	0.25
TCells|cDC2_4	CXCL8_CXCR2	TRUE	FALSE	TRUE	0.399	0	0.25
cDC2_4|cDC2_4	CXCL8_CXCR2	TRUE	FALSE	TRUE	0.43	0	0.25
TCells|Macrophages5	CD52_SIGLEC10	TRUE	FALSE	FALSE	1.303	0	0.25
TCells|cDC2_4	CD52_SIGLEC10	TRUE	FALSE	FALSE	1.361	0	0.25
cDC2_4|Macrophages5	CD52_SIGLEC10	TRUE	FALSE	FALSE	1.269	0	0.25
cDC2_4|cDC2_4	CD52_SIGLEC10	TRUE	FALSE	FALSE	1.327	0	0.25
Macrophages3|Macrophages3	EPHB2_EFNB1	FALSE	TRUE	FALSE	0.174	0	0.25
Macrophages3|cDC2_4	EPHB2_EFNB1	FALSE	TRUE	FALSE	0.188	0	0.25
Macrophages5|Macrophages3	EPHB2_EFNB1	FALSE	TRUE	FALSE	0.151	0	0.25
Macrophages5|cDC2_4	EPHB2_EFNB1	FALSE	TRUE	FALSE	0.166	0	0.25
Macrophages3|Macrophages3	CXCL10_DPP4	TRUE	FALSE	TRUE	0.32	0	0.25
Macrophages3|TCells	CXCL10_DPP4	TRUE	FALSE	TRUE	0.247	0.009	0.25
cDC2_4|Macrophages3	CXCL10_DPP4	TRUE	FALSE	TRUE	0.307	0	0.25
cDC2_4|TCells	CXCL10_DPP4	TRUE	FALSE	TRUE	0.234	0.036	0.25
Macrophages3|Macrophages3	CXCL8_ACKR1	TRUE	FALSE	TRUE	0.247	0.014	0.25
Macrophages3|cDC2_4	CXCL8_ACKR1	TRUE	FALSE	TRUE	0.265	0.006	0.25
Macrophages5|Macrophages3	CXCL8_ACKR1	TRUE	FALSE	TRUE	0.256	0.033	0.25
Macrophages5|cDC2_4	CXCL8_ACKR1	TRUE	FALSE	TRUE	0.274	0.015	0.25
TCells|Macrophages3	CTLA4_CD80	FALSE	FALSE	TRUE	0.391	0	0.25
TCells|Macrophages5	CTLA4_CD80	FALSE	FALSE	TRUE	0.38	0	0.25
TCells|TCells	CTLA4_CD80	FALSE	FALSE	TRUE	0.401	0	0.25
TCells|cDC2_4	CTLA4_CD80	FALSE	FALSE	TRUE	0.537	0	0.25
TCells|Macrophages3	CD28_CD80	FALSE	FALSE	TRUE	0.334	0	0.25
TCells|Macrophages5	CD28_CD80	FALSE	FALSE	TRUE	0.323	0.003	0.25
TCells|TCells	CD28_CD80	FALSE	FALSE	TRUE	0.344	0	0.25
TCells|cDC2_4	CD28_CD80	FALSE	FALSE	TRUE	0.479	0	0.25
TCells|Macrophages3	PDCD1_FAM3C	TRUE	TRUE	FALSE	0.286	0.012	0.25
TCells|Macrophages5	PDCD1_FAM3C	TRUE	TRUE	FALSE	0.375	0	0.25
TCells|TCells	PDCD1_FAM3C	TRUE	TRUE	FALSE	0.348	0	0.25
TCells|cDC2_4	PDCD1_FAM3C	TRUE	TRUE	FALSE	0.285	0.015	0.25
TCells|Macrophages3	ICAM3_CD209	TRUE	FALSE	TRUE	0.465	0	0.25
TCells|Macrophages5	ICAM3_CD209	TRUE	FALSE	TRUE	0.5	0	0.25
cDC2_4|Macrophages3	ICAM3_CD209	TRUE	FALSE	TRUE	0.373	0	0.25
cDC2_4|Macrophages5	ICAM3_CD209	TRUE	FALSE	TRUE	0.408	0	0.25
Macrophages3|Macrophages3	CCL2_ACKR1	TRUE	FALSE	TRUE	0.594	0	0.25
Macrophages3|cDC2_4	CCL2_ACKR1	TRUE	FALSE	TRUE	0.612	0	0.25
Macrophages5|Macrophages3	CCL2_ACKR1	TRUE	FALSE	TRUE	0.367	0	0.25
Macrophages5|cDC2_4	CCL2_ACKR1	TRUE	FALSE	TRUE	0.384	0	0.25
TCells|Macrophages3	PTPRC_CD22	FALSE	FALSE	TRUE	1.183	0.009	0.25
TCells|Macrophages5	PTPRC_CD22	FALSE	FALSE	TRUE	1.184	0.011	0.25
cDC2_4|Macrophages3	PTPRC_CD22	FALSE	FALSE	TRUE	1.291	0	0.25
cDC2_4|Macrophages5	PTPRC_CD22	FALSE	FALSE	TRUE	1.292	0	0.25
Macrophages3|cDC2_4	IL1 receptor_IL1RN	TRUE	TRUE	FALSE	0.245	0.006	0.25
Macrophages5|cDC2_4	IL1 receptor_IL1RN	TRUE	TRUE	FALSE	0.271	0	0.25
cDC2_4|Macrophages3	IL1 receptor_IL1RN	TRUE	TRUE	FALSE	0.263	0	0.25
cDC2_4|cDC2_4	IL1 receptor_IL1RN	TRUE	TRUE	FALSE	0.351	0	0.25
TCells|Macrophages3	CD2_CD58	FALSE	TRUE	FALSE	1.186	0	0.25
TCells|Macrophages5	CD2_CD58	FALSE	TRUE	FALSE	1.31	0	0.25
TCells|TCells	CD2_CD58	FALSE	TRUE	FALSE	1.252	0	0.25
TCells|cDC2_4	CD2_CD58	FALSE	TRUE	FALSE	1.541	0	0.25
TCells|Macrophages3	BTLA_TNFRSF14	FALSE	TRUE	TRUE	0.422	0	0.25
TCells|Macrophages5	BTLA_TNFRSF14	FALSE	TRUE	TRUE	0.351	0.012	0.25
TCells|TCells	BTLA_TNFRSF14	FALSE	TRUE	TRUE	0.312	0.012	0.25
TCells|cDC2_4	BTLA_TNFRSF14	FALSE	TRUE	TRUE	0.325	0.036	0.25
Macrophages3|Macrophages3	TNFSF13_TNFRSF14	TRUE	FALSE	TRUE	0.34	0	0.25
Macrophages5|Macrophages3	TNFSF13_TNFRSF14	TRUE	FALSE	TRUE	0.37	0	0.25
Macrophages5|Macrophages5	TNFSF13_TNFRSF14	TRUE	FALSE	TRUE	0.299	0.027	0.25
cDC2_4|Macrophages3	TNFSF13_TNFRSF14	TRUE	FALSE	TRUE	0.337	0	0.25
TCells|Macrophages3	TIGIT_NECTIN2	FALSE	FALSE	TRUE	0.837	0	0.25
TCells|Macrophages5	TIGIT_NECTIN2	FALSE	FALSE	TRUE	0.816	0	0.25
TCells|TCells	TIGIT_NECTIN2	FALSE	FALSE	TRUE	0.674	0	0.25
TCells|cDC2_4	TIGIT_NECTIN2	FALSE	FALSE	TRUE	0.885	0	0.25
Macrophages3|Macrophages5	CCL2_CCR2	TRUE	FALSE	TRUE	0.628	0	0.25
Macrophages3|cDC2_4	CCL2_CCR2	TRUE	FALSE	TRUE	0.663	0	0.25
Macrophages5|Macrophages5	CCL2_CCR2	TRUE	FALSE	TRUE	0.4	0	0.25
Macrophages5|cDC2_4	CCL2_CCR2	TRUE	FALSE	TRUE	0.435	0	0.25
TCells|Macrophages3	LTA_TNFRSF14	TRUE	FALSE	TRUE	0.535	0	0.25
TCells|Macrophages5	LTA_TNFRSF14	TRUE	FALSE	TRUE	0.464	0	0.25
TCells|TCells	LTA_TNFRSF14	TRUE	FALSE	TRUE	0.425	0	0.25
TCells|cDC2_4	LTA_TNFRSF14	TRUE	FALSE	TRUE	0.438	0	0.25
TCells|Macrophages3	LTA_LTBR	TRUE	FALSE	TRUE	0.427	0	0.25
TCells|Macrophages5	LTA_LTBR	TRUE	FALSE	TRUE	0.467	0	0.25
TCells|TCells	LTA_LTBR	TRUE	FALSE	TRUE	0.315	0	0.25
TCells|cDC2_4	LTA_LTBR	TRUE	FALSE	TRUE	0.418	0	0.25
Macrophages3|Macrophages3	CCR5_CCL8	TRUE	TRUE	FALSE	0.369	0	0.25
Macrophages5|Macrophages3	CCR5_CCL8	TRUE	TRUE	FALSE	0.291	0.012	0.25
TCells|Macrophages3	CCR5_CCL8	TRUE	TRUE	FALSE	0.312	0	0.25
cDC2_4|Macrophages3	CCR5_CCL8	TRUE	TRUE	FALSE	0.313	0	0.25
Macrophages3|TCells	FAM3C_CLEC2D	TRUE	FALSE	TRUE	0.6	0	0.25
Macrophages5|TCells	FAM3C_CLEC2D	TRUE	FALSE	TRUE	0.689	0	0.25
TCells|TCells	FAM3C_CLEC2D	TRUE	FALSE	TRUE	0.662	0	0.25
cDC2_4|TCells	FAM3C_CLEC2D	TRUE	FALSE	TRUE	0.6	0	0.25
Macrophages3|cDC2_4	TNFRSF10B_TNFSF10	TRUE	TRUE	FALSE	0.382	0.024	0.25
Macrophages5|cDC2_4	TNFRSF10B_TNFSF10	TRUE	TRUE	FALSE	0.389	0.009	0.25
TCells|cDC2_4	TNFRSF10B_TNFSF10	TRUE	TRUE	FALSE	0.373	0.012	0.25
cDC2_4|cDC2_4	TNFRSF10B_TNFSF10	TRUE	TRUE	FALSE	0.386	0.012	0.25
Macrophages5|Macrophages3	CCR2_CCL13	TRUE	TRUE	FALSE	1.009	0	0.25
Macrophages5|Macrophages5	CCR2_CCL13	TRUE	TRUE	FALSE	0.579	0	0.25
cDC2_4|Macrophages3	CCR2_CCL13	TRUE	TRUE	FALSE	1.044	0	0.25
cDC2_4|Macrophages5	CCR2_CCL13	TRUE	TRUE	FALSE	0.615	0	0.25
Macrophages5|Macrophages3	CCL4_CCR5	TRUE	FALSE	TRUE	0.877	0	0.25
Macrophages5|Macrophages5	CCL4_CCR5	TRUE	FALSE	TRUE	0.799	0	0.25
Macrophages5|TCells	CCL4_CCR5	TRUE	FALSE	TRUE	0.82	0	0.25
Macrophages5|cDC2_4	CCL4_CCR5	TRUE	FALSE	TRUE	0.822	0	0.25
cDC2_4|Macrophages3	WNT5A_FZD1	TRUE	FALSE	TRUE	0.224	0.003	0.25
cDC2_4|Macrophages5	WNT5A_FZD1	TRUE	FALSE	TRUE	0.254	0	0.25
cDC2_4|TCells	WNT5A_FZD1	TRUE	FALSE	TRUE	0.241	0	0.25
cDC2_4|cDC2_4	WNT5A_FZD1	TRUE	FALSE	TRUE	0.228	0	0.25
Macrophages3|TCells	CD47_SIRPG	FALSE	TRUE	FALSE	0.747	0	0.25
Macrophages5|TCells	CD47_SIRPG	FALSE	TRUE	FALSE	0.69	0	0.25
TCells|TCells	CD47_SIRPG	FALSE	TRUE	FALSE	0.66	0	0.25
cDC2_4|TCells	CD47_SIRPG	FALSE	TRUE	FALSE	0.705	0	0.25
TCells|Macrophages3	CCL5_CCR5	TRUE	FALSE	TRUE	0.582	0	0.25
TCells|Macrophages5	CCL5_CCR5	TRUE	FALSE	TRUE	0.504	0	0.25
TCells|TCells	CCL5_CCR5	TRUE	FALSE	TRUE	0.525	0	0.25
TCells|cDC2_4	CCL5_CCR5	TRUE	FALSE	TRUE	0.527	0	0.25
Macrophages3|Macrophages3	MDK_LRP1	TRUE	FALSE	TRUE	0.463	0	0.25
Macrophages3|Macrophages5	MDK_LRP1	TRUE	FALSE	TRUE	0.519	0	0.25
TCells|Macrophages3	MDK_LRP1	TRUE	FALSE	TRUE	0.492	0	0.25
TCells|Macrophages5	MDK_LRP1	TRUE	FALSE	TRUE	0.547	0	0.25
Macrophages3|Macrophages3	PDGFB_LRP1	TRUE	FALSE	TRUE	0.449	0	0.25
Macrophages3|Macrophages5	PDGFB_LRP1	TRUE	FALSE	TRUE	0.505	0	0.25
Macrophages5|Macrophages3	PDGFB_LRP1	TRUE	FALSE	TRUE	0.455	0	0.25
Macrophages5|Macrophages5	PDGFB_LRP1	TRUE	FALSE	TRUE	0.51	0	0.25
Macrophages3|Macrophages3	ADRB2_VEGFB	TRUE	TRUE	FALSE	0.164	0.009	0.25
Macrophages5|Macrophages3	ADRB2_VEGFB	TRUE	TRUE	FALSE	0.256	0	0.25
Macrophages5|Macrophages5	ADRB2_VEGFB	TRUE	TRUE	FALSE	0.212	0	0.25
Macrophages5|cDC2_4	ADRB2_VEGFB	TRUE	TRUE	FALSE	0.176	0	0.25
Macrophages5|Macrophages3	CCL3_IDE	TRUE	FALSE	TRUE	0.62	0.003	0.25
Macrophages5|Macrophages5	CCL3_IDE	TRUE	FALSE	TRUE	0.617	0	0.25
Macrophages5|TCells	CCL3_IDE	TRUE	FALSE	TRUE	0.62	0	0.25
Macrophages5|cDC2_4	CCL3_IDE	TRUE	FALSE	TRUE	0.609	0	0.25
Macrophages3|Macrophages3	IGF1_IGF1R	TRUE	FALSE	TRUE	0.119	0.018	0.25
Macrophages3|TCells	IGF1_IGF1R	TRUE	FALSE	TRUE	0.143	0	0.25
Macrophages5|Macrophages3	IGF1_IGF1R	TRUE	FALSE	TRUE	0.122	0.015	0.25
Macrophages5|TCells	IGF1_IGF1R	TRUE	FALSE	TRUE	0.147	0	0.25
Macrophages3|Macrophages5	NOTCH1_JAG1	FALSE	TRUE	FALSE	0.172	0.003	0.25
Macrophages5|Macrophages3	NOTCH1_JAG1	FALSE	TRUE	FALSE	0.141	0.024	0.25
Macrophages5|Macrophages5	NOTCH1_JAG1	FALSE	TRUE	FALSE	0.181	0.003	0.25
cDC2_4|Macrophages5	NOTCH1_JAG1	FALSE	TRUE	FALSE	0.166	0	0.25
Macrophages5|Macrophages5	TNF_TNFRSF1A	TRUE	FALSE	TRUE	0.516	0.018	0.312
TCells|Macrophages3	TNF_TNFRSF1A	TRUE	FALSE	TRUE	0.604	0	0.312
TCells|Macrophages5	TNF_TNFRSF1A	TRUE	FALSE	TRUE	0.668	0	0.312
TCells|cDC2_4	TNF_TNFRSF1A	TRUE	FALSE	TRUE	0.58	0	0.312
cDC2_4|Macrophages5	TNF_TNFRSF1A	TRUE	FALSE	TRUE	0.55	0	0.312
Macrophages3|TCells	ICAM1_SPN	FALSE	TRUE	FALSE	0.577	0	0.312
Macrophages3|cDC2_4	ICAM1_SPN	FALSE	TRUE	FALSE	0.796	0	0.312
Macrophages5|cDC2_4	ICAM1_SPN	FALSE	TRUE	FALSE	0.74	0	0.312
TCells|cDC2_4	ICAM1_SPN	FALSE	TRUE	FALSE	0.563	0	0.312
cDC2_4|cDC2_4	ICAM1_SPN	FALSE	TRUE	FALSE	0.724	0	0.312
TCells|Macrophages3	CD6_ALCAM	TRUE	FALSE	FALSE	0.704	0	0.312
TCells|Macrophages5	CD6_ALCAM	TRUE	FALSE	FALSE	0.866	0	0.312
TCells|cDC2_4	CD6_ALCAM	TRUE	FALSE	FALSE	0.867	0	0.312
cDC2_4|Macrophages5	CD6_ALCAM	TRUE	FALSE	FALSE	0.748	0	0.312
cDC2_4|cDC2_4	CD6_ALCAM	TRUE	FALSE	FALSE	0.749	0	0.312
Macrophages3|cDC2_4	CD226_NECTIN2	FALSE	TRUE	TRUE	0.297	0.009	0.312
TCells|Macrophages3	CD226_NECTIN2	FALSE	TRUE	TRUE	0.329	0	0.312
TCells|Macrophages5	CD226_NECTIN2	FALSE	TRUE	TRUE	0.308	0	0.312
TCells|cDC2_4	CD226_NECTIN2	FALSE	TRUE	TRUE	0.377	0	0.312
cDC2_4|cDC2_4	CD226_NECTIN2	FALSE	TRUE	TRUE	0.319	0.003	0.312
TCells|Macrophages3	TNFSF14_LTBR	TRUE	FALSE	TRUE	0.231	0	0.312
TCells|Macrophages5	TNFSF14_LTBR	TRUE	FALSE	TRUE	0.271	0	0.312
TCells|cDC2_4	TNFSF14_LTBR	TRUE	FALSE	TRUE	0.222	0	0.312
cDC2_4|Macrophages3	TNFSF14_LTBR	TRUE	FALSE	TRUE	0.205	0.03	0.312
cDC2_4|Macrophages5	TNFSF14_LTBR	TRUE	FALSE	TRUE	0.246	0	0.312
Macrophages3|Macrophages3	CCL3_CCR5	TRUE	FALSE	TRUE	0.519	0.015	0.312
Macrophages5|Macrophages3	CCL3_CCR5	TRUE	FALSE	TRUE	0.727	0	0.312
Macrophages5|Macrophages5	CCL3_CCR5	TRUE	FALSE	TRUE	0.649	0.003	0.312
Macrophages5|TCells	CCL3_CCR5	TRUE	FALSE	TRUE	0.67	0.003	0.312
Macrophages5|cDC2_4	CCL3_CCR5	TRUE	FALSE	TRUE	0.672	0	0.312
Macrophages5|Macrophages3	HLA-F_LILRB2	FALSE	FALSE	TRUE	0.61	0.035	0.312
Macrophages5|Macrophages5	HLA-F_LILRB2	FALSE	FALSE	TRUE	0.62	0.021	0.312
TCells|Macrophages3	HLA-F_LILRB2	FALSE	FALSE	TRUE	0.726	0	0.312
TCells|Macrophages5	HLA-F_LILRB2	FALSE	FALSE	TRUE	0.736	0	0.312
TCells|cDC2_4	HLA-F_LILRB2	FALSE	FALSE	TRUE	0.605	0.003	0.312
Macrophages3|Macrophages3	PROS1_AXL	TRUE	FALSE	TRUE	0.3	0	0.312
Macrophages3|cDC2_4	PROS1_AXL	TRUE	FALSE	TRUE	0.577	0	0.312
Macrophages5|Macrophages3	PROS1_AXL	TRUE	FALSE	TRUE	0.345	0	0.312
Macrophages5|Macrophages5	PROS1_AXL	TRUE	FALSE	TRUE	0.285	0.041	0.312
Macrophages5|cDC2_4	PROS1_AXL	TRUE	FALSE	TRUE	0.622	0	0.312
Macrophages3|Macrophages5	DSC2_DSG2	FALSE	FALSE	FALSE	0.308	0	0.312
Macrophages3|TCells	DSC2_DSG2	FALSE	FALSE	FALSE	0.377	0	0.312
Macrophages5|Macrophages5	DSC2_DSG2	FALSE	FALSE	FALSE	0.326	0	0.312
Macrophages5|TCells	DSC2_DSG2	FALSE	FALSE	FALSE	0.395	0	0.312
cDC2_4|TCells	DSC2_DSG2	FALSE	FALSE	FALSE	0.302	0.003	0.312
Macrophages3|Macrophages5	MET_HGF	TRUE	TRUE	FALSE	0.303	0	0.312
Macrophages5|Macrophages5	MET_HGF	TRUE	TRUE	FALSE	0.301	0	0.312
TCells|Macrophages3	MET_HGF	TRUE	TRUE	FALSE	0.197	0	0.312
TCells|Macrophages5	MET_HGF	TRUE	TRUE	FALSE	0.345	0	0.312
cDC2_4|Macrophages5	MET_HGF	TRUE	TRUE	FALSE	0.294	0	0.312
Macrophages3|Macrophages3	HGF_CD44	TRUE	FALSE	TRUE	0.8	0	0.375
Macrophages3|Macrophages5	HGF_CD44	TRUE	FALSE	TRUE	0.842	0	0.375
Macrophages5|Macrophages3	HGF_CD44	TRUE	FALSE	TRUE	0.948	0	0.375
Macrophages5|Macrophages5	HGF_CD44	TRUE	FALSE	TRUE	0.99	0	0.375
Macrophages5|TCells	HGF_CD44	TRUE	FALSE	TRUE	0.763	0	0.375
Macrophages5|cDC2_4	HGF_CD44	TRUE	FALSE	TRUE	0.797	0.003	0.375
Macrophages3|Macrophages3	LAMP1_FAM3C	TRUE	TRUE	FALSE	0.739	0	0.375
Macrophages3|Macrophages5	LAMP1_FAM3C	TRUE	TRUE	FALSE	0.828	0	0.375
Macrophages3|TCells	LAMP1_FAM3C	TRUE	TRUE	FALSE	0.801	0	0.375
Macrophages3|cDC2_4	LAMP1_FAM3C	TRUE	TRUE	FALSE	0.739	0	0.375
Macrophages5|Macrophages5	LAMP1_FAM3C	TRUE	TRUE	FALSE	0.569	0	0.375
Macrophages5|TCells	LAMP1_FAM3C	TRUE	TRUE	FALSE	0.542	0.006	0.375
Macrophages3|Macrophages5	PGRMC2_CCL4L2	TRUE	TRUE	FALSE	0.663	0	0.375
Macrophages3|cDC2_4	PGRMC2_CCL4L2	TRUE	TRUE	FALSE	0.566	0.018	0.375
Macrophages5|Macrophages5	PGRMC2_CCL4L2	TRUE	TRUE	FALSE	0.598	0.006	0.375
TCells|Macrophages5	PGRMC2_CCL4L2	TRUE	TRUE	FALSE	0.666	0	0.375
TCells|cDC2_4	PGRMC2_CCL4L2	TRUE	TRUE	FALSE	0.569	0.003	0.375
cDC2_4|Macrophages5	PGRMC2_CCL4L2	TRUE	TRUE	FALSE	0.617	0	0.375
Macrophages3|Macrophages3	AXL_IL15RA	TRUE	TRUE	TRUE	0.316	0.003	0.375
Macrophages3|Macrophages5	AXL_IL15RA	TRUE	TRUE	TRUE	0.317	0	0.375
Macrophages3|TCells	AXL_IL15RA	TRUE	TRUE	TRUE	0.299	0.006	0.375
cDC2_4|Macrophages3	AXL_IL15RA	TRUE	TRUE	TRUE	0.593	0	0.375
cDC2_4|Macrophages5	AXL_IL15RA	TRUE	TRUE	TRUE	0.594	0	0.375
cDC2_4|TCells	AXL_IL15RA	TRUE	TRUE	TRUE	0.575	0	0.375
Macrophages3|Macrophages3	CSF1R_CSF1	TRUE	TRUE	FALSE	0.647	0	0.375
Macrophages3|TCells	CSF1R_CSF1	TRUE	TRUE	FALSE	0.693	0	0.375
Macrophages5|Macrophages3	CSF1R_CSF1	TRUE	TRUE	FALSE	0.897	0	0.375
Macrophages5|TCells	CSF1R_CSF1	TRUE	TRUE	FALSE	0.942	0	0.375
cDC2_4|Macrophages3	CSF1R_CSF1	TRUE	TRUE	FALSE	0.574	0	0.375
cDC2_4|TCells	CSF1R_CSF1	TRUE	TRUE	FALSE	0.62	0	0.375
Macrophages3|Macrophages3	JAG1_NOTCH2	FALSE	FALSE	TRUE	0.225	0.006	0.375
Macrophages3|cDC2_4	JAG1_NOTCH2	FALSE	FALSE	TRUE	0.215	0.015	0.375
Macrophages5|Macrophages3	JAG1_NOTCH2	FALSE	FALSE	TRUE	0.265	0	0.375
Macrophages5|Macrophages5	JAG1_NOTCH2	FALSE	FALSE	TRUE	0.23	0.018	0.375
Macrophages5|TCells	JAG1_NOTCH2	FALSE	FALSE	TRUE	0.224	0.003	0.375
Macrophages5|cDC2_4	JAG1_NOTCH2	FALSE	FALSE	TRUE	0.256	0.003	0.375
Macrophages3|Macrophages3	ANXA1_FPR2	TRUE	FALSE	TRUE	0.772	0	0.375
Macrophages3|cDC2_4	ANXA1_FPR2	TRUE	FALSE	TRUE	0.824	0	0.375
Macrophages5|Macrophages3	ANXA1_FPR2	TRUE	FALSE	TRUE	0.859	0	0.375
Macrophages5|cDC2_4	ANXA1_FPR2	TRUE	FALSE	TRUE	0.912	0	0.375
cDC2_4|Macrophages3	ANXA1_FPR2	TRUE	FALSE	TRUE	0.831	0	0.375
cDC2_4|cDC2_4	ANXA1_FPR2	TRUE	FALSE	TRUE	0.884	0	0.375
Macrophages3|Macrophages3	C3_C3AR1	TRUE	FALSE	TRUE	0.658	0	0.375
Macrophages3|Macrophages5	C3_C3AR1	TRUE	FALSE	TRUE	0.941	0	0.375
Macrophages5|Macrophages3	C3_C3AR1	TRUE	FALSE	TRUE	0.899	0	0.375
Macrophages5|Macrophages5	C3_C3AR1	TRUE	FALSE	TRUE	1.181	0	0.375
cDC2_4|Macrophages3	C3_C3AR1	TRUE	FALSE	TRUE	0.737	0	0.375
cDC2_4|Macrophages5	C3_C3AR1	TRUE	FALSE	TRUE	1.02	0	0.375
Macrophages3|TCells	PLXNB2_SEMA4D	FALSE	TRUE	TRUE	0.298	0.009	0.375
Macrophages5|Macrophages3	PLXNB2_SEMA4D	FALSE	TRUE	TRUE	0.311	0.017	0.375
Macrophages5|Macrophages5	PLXNB2_SEMA4D	FALSE	TRUE	TRUE	0.342	0.003	0.375
Macrophages5|TCells	PLXNB2_SEMA4D	FALSE	TRUE	TRUE	0.36	0	0.375
Macrophages5|cDC2_4	PLXNB2_SEMA4D	FALSE	TRUE	TRUE	0.314	0.027	0.375
cDC2_4|TCells	PLXNB2_SEMA4D	FALSE	TRUE	TRUE	0.306	0.006	0.375
Macrophages3|Macrophages3	CCL5_CCR1	TRUE	FALSE	TRUE	0.632	0	0.375
Macrophages5|Macrophages3	CCL5_CCR1	TRUE	FALSE	TRUE	0.607	0	0.375
TCells|Macrophages3	CCL5_CCR1	TRUE	FALSE	TRUE	0.946	0	0.375
TCells|Macrophages5	CCL5_CCR1	TRUE	FALSE	TRUE	0.719	0	0.375
TCells|cDC2_4	CCL5_CCR1	TRUE	FALSE	TRUE	0.49	0.039	0.375
cDC2_4|Macrophages3	CCL5_CCR1	TRUE	FALSE	TRUE	0.59	0.003	0.375
Macrophages3|Macrophages3	CSF1_SIRPA	TRUE	FALSE	TRUE	0.581	0	0.375
Macrophages3|Macrophages5	CSF1_SIRPA	TRUE	FALSE	TRUE	0.45	0	0.375
Macrophages3|cDC2_4	CSF1_SIRPA	TRUE	FALSE	TRUE	0.351	0.039	0.375
TCells|Macrophages3	CSF1_SIRPA	TRUE	FALSE	TRUE	0.627	0	0.375
TCells|Macrophages5	CSF1_SIRPA	TRUE	FALSE	TRUE	0.496	0	0.375
TCells|cDC2_4	CSF1_SIRPA	TRUE	FALSE	TRUE	0.397	0	0.375
Macrophages3|Macrophages3	CCR1_CCL18	TRUE	TRUE	FALSE	1.552	0	0.375
Macrophages3|Macrophages5	CCR1_CCL18	TRUE	TRUE	FALSE	0.637	0.021	0.375
Macrophages3|TCells	CCR1_CCL18	TRUE	TRUE	FALSE	0.612	0	0.375
Macrophages3|cDC2_4	CCR1_CCL18	TRUE	TRUE	FALSE	0.619	0.006	0.375
Macrophages5|Macrophages3	CCR1_CCL18	TRUE	TRUE	FALSE	1.325	0	0.375
cDC2_4|Macrophages3	CCR1_CCL18	TRUE	TRUE	FALSE	1.096	0	0.375
Macrophages3|Macrophages5	C5AR1_RPS19	FALSE	TRUE	FALSE	1.951	0	0.375
Macrophages3|TCells	C5AR1_RPS19	FALSE	TRUE	FALSE	2.273	0	0.375
Macrophages3|cDC2_4	C5AR1_RPS19	FALSE	TRUE	FALSE	2.22	0	0.375
Macrophages5|Macrophages5	C5AR1_RPS19	FALSE	TRUE	FALSE	1.893	0	0.375
Macrophages5|TCells	C5AR1_RPS19	FALSE	TRUE	FALSE	2.215	0	0.375
Macrophages5|cDC2_4	C5AR1_RPS19	FALSE	TRUE	FALSE	2.162	0	0.375
Macrophages3|Macrophages3	LGALS9_MRC2	TRUE	FALSE	TRUE	0.633	0	0.375
Macrophages3|Macrophages5	LGALS9_MRC2	TRUE	FALSE	TRUE	0.67	0	0.375
Macrophages5|Macrophages3	LGALS9_MRC2	TRUE	FALSE	TRUE	0.504	0	0.375
Macrophages5|Macrophages5	LGALS9_MRC2	TRUE	FALSE	TRUE	0.542	0	0.375
cDC2_4|Macrophages3	LGALS9_MRC2	TRUE	FALSE	TRUE	0.535	0	0.375
cDC2_4|Macrophages5	LGALS9_MRC2	TRUE	FALSE	TRUE	0.572	0	0.375
Macrophages3|Macrophages3	CD46_JAG1	FALSE	TRUE	FALSE	0.582	0.015	0.375
Macrophages3|Macrophages5	CD46_JAG1	FALSE	TRUE	FALSE	0.622	0	0.375
Macrophages5|Macrophages3	CD46_JAG1	FALSE	TRUE	FALSE	0.63	0	0.375
Macrophages5|Macrophages5	CD46_JAG1	FALSE	TRUE	FALSE	0.67	0	0.375
Macrophages5|cDC2_4	CD46_JAG1	FALSE	TRUE	FALSE	0.581	0.024	0.375
cDC2_4|Macrophages5	CD46_JAG1	FALSE	TRUE	FALSE	0.574	0.006	0.375
Macrophages3|Macrophages3	NRP1_VEGFB	TRUE	TRUE	FALSE	0.557	0	0.375
Macrophages3|Macrophages5	NRP1_VEGFB	TRUE	TRUE	FALSE	0.513	0	0.375
Macrophages3|cDC2_4	NRP1_VEGFB	TRUE	TRUE	FALSE	0.477	0	0.375
Macrophages5|Macrophages3	NRP1_VEGFB	TRUE	TRUE	FALSE	0.614	0	0.375
Macrophages5|Macrophages5	NRP1_VEGFB	TRUE	TRUE	FALSE	0.57	0	0.375
Macrophages5|cDC2_4	NRP1_VEGFB	TRUE	TRUE	FALSE	0.534	0	0.375
Macrophages3|Macrophages3	HLA-DPA1_TNFSF9	TRUE	TRUE	FALSE	1.808	0.003	0.375
Macrophages3|Macrophages5	HLA-DPA1_TNFSF9	TRUE	TRUE	FALSE	1.814	0	0.375
Macrophages5|Macrophages3	HLA-DPA1_TNFSF9	TRUE	TRUE	FALSE	2.23	0	0.375
Macrophages5|Macrophages5	HLA-DPA1_TNFSF9	TRUE	TRUE	FALSE	2.236	0	0.375
cDC2_4|Macrophages3	HLA-DPA1_TNFSF9	TRUE	TRUE	FALSE	2.419	0	0.375
cDC2_4|Macrophages5	HLA-DPA1_TNFSF9	TRUE	TRUE	FALSE	2.425	0	0.375
Macrophages3|Macrophages3	SEMA4A_PLXND1	FALSE	FALSE	TRUE	0.472	0	0.375
Macrophages3|Macrophages5	SEMA4A_PLXND1	FALSE	FALSE	TRUE	0.458	0	0.375
Macrophages5|Macrophages3	SEMA4A_PLXND1	FALSE	FALSE	TRUE	0.42	0	0.375
Macrophages5|Macrophages5	SEMA4A_PLXND1	FALSE	FALSE	TRUE	0.407	0	0.375
cDC2_4|Macrophages3	SEMA4A_PLXND1	FALSE	FALSE	TRUE	0.54	0	0.375
cDC2_4|Macrophages5	SEMA4A_PLXND1	FALSE	FALSE	TRUE	0.527	0	0.375
Macrophages3|Macrophages3	ICAM1_AREG	TRUE	TRUE	FALSE	0.474	0	0.375
Macrophages3|Macrophages5	ICAM1_AREG	TRUE	TRUE	FALSE	0.438	0.009	0.375
Macrophages3|cDC2_4	ICAM1_AREG	TRUE	TRUE	FALSE	0.61	0	0.375
Macrophages5|Macrophages3	ICAM1_AREG	TRUE	TRUE	FALSE	0.418	0.05	0.375
Macrophages5|cDC2_4	ICAM1_AREG	TRUE	TRUE	FALSE	0.554	0	0.375
cDC2_4|cDC2_4	ICAM1_AREG	TRUE	TRUE	FALSE	0.538	0	0.375
Macrophages3|Macrophages3	CCL3L1_CCR1	TRUE	FALSE	TRUE	0.672	0	0.438
Macrophages3|Macrophages5	CCL3L1_CCR1	TRUE	FALSE	TRUE	0.445	0.011	0.438
Macrophages5|Macrophages3	CCL3L1_CCR1	TRUE	FALSE	TRUE	0.951	0	0.438
Macrophages5|Macrophages5	CCL3L1_CCR1	TRUE	FALSE	TRUE	0.724	0	0.438
Macrophages5|cDC2_4	CCL3L1_CCR1	TRUE	FALSE	TRUE	0.495	0	0.438
cDC2_4|Macrophages3	CCL3L1_CCR1	TRUE	FALSE	TRUE	0.703	0	0.438
cDC2_4|Macrophages5	CCL3L1_CCR1	TRUE	FALSE	TRUE	0.476	0.003	0.438
Macrophages3|Macrophages3	LAIR1_LILRB4	FALSE	TRUE	TRUE	1.104	0	0.438
Macrophages3|Macrophages5	LAIR1_LILRB4	FALSE	TRUE	TRUE	0.965	0	0.438
Macrophages3|cDC2_4	LAIR1_LILRB4	FALSE	TRUE	TRUE	0.682	0	0.438
Macrophages5|Macrophages3	LAIR1_LILRB4	FALSE	TRUE	TRUE	1.135	0	0.438
Macrophages5|Macrophages5	LAIR1_LILRB4	FALSE	TRUE	TRUE	0.995	0	0.438
Macrophages5|cDC2_4	LAIR1_LILRB4	FALSE	TRUE	TRUE	0.712	0	0.438
cDC2_4|Macrophages3	LAIR1_LILRB4	FALSE	TRUE	TRUE	0.651	0	0.438
Macrophages5|Macrophages3	CCL4L2_VSIR	TRUE	FALSE	TRUE	0.639	0.009	0.438
Macrophages5|Macrophages5	CCL4L2_VSIR	TRUE	FALSE	TRUE	0.775	0	0.438
Macrophages5|TCells	CCL4L2_VSIR	TRUE	FALSE	TRUE	0.672	0	0.438
Macrophages5|cDC2_4	CCL4L2_VSIR	TRUE	FALSE	TRUE	0.739	0	0.438
cDC2_4|Macrophages5	CCL4L2_VSIR	TRUE	FALSE	TRUE	0.678	0	0.438
cDC2_4|TCells	CCL4L2_VSIR	TRUE	FALSE	TRUE	0.575	0.039	0.438
cDC2_4|cDC2_4	CCL4L2_VSIR	TRUE	FALSE	TRUE	0.642	0.006	0.438
Macrophages3|Macrophages3	CD44_HBEGF	TRUE	TRUE	TRUE	0.927	0	0.438
Macrophages3|Macrophages5	CD44_HBEGF	TRUE	TRUE	TRUE	0.827	0	0.438
Macrophages5|Macrophages3	CD44_HBEGF	TRUE	TRUE	TRUE	0.969	0	0.438
Macrophages5|Macrophages5	CD44_HBEGF	TRUE	TRUE	TRUE	0.869	0.009	0.438
Macrophages5|cDC2_4	CD44_HBEGF	TRUE	TRUE	TRUE	0.792	0.027	0.438
TCells|Macrophages3	CD44_HBEGF	TRUE	TRUE	TRUE	0.742	0.021	0.438
cDC2_4|Macrophages3	CD44_HBEGF	TRUE	TRUE	TRUE	0.776	0.024	0.438
Macrophages3|Macrophages3	LGALS9_COLEC12	TRUE	FALSE	TRUE	0.976	0	0.438
Macrophages3|Macrophages5	LGALS9_COLEC12	TRUE	FALSE	TRUE	0.773	0	0.438
Macrophages5|Macrophages3	LGALS9_COLEC12	TRUE	FALSE	TRUE	0.848	0	0.438
Macrophages5|Macrophages5	LGALS9_COLEC12	TRUE	FALSE	TRUE	0.644	0	0.438
TCells|Macrophages3	LGALS9_COLEC12	TRUE	FALSE	TRUE	0.528	0	0.438
cDC2_4|Macrophages3	LGALS9_COLEC12	TRUE	FALSE	TRUE	0.878	0	0.438
cDC2_4|Macrophages5	LGALS9_COLEC12	TRUE	FALSE	TRUE	0.675	0	0.438
Macrophages3|Macrophages5	ALOX5_ALOX5AP	FALSE	FALSE	FALSE	1.27	0	0.438
Macrophages3|cDC2_4	ALOX5_ALOX5AP	FALSE	FALSE	FALSE	1.985	0	0.438
Macrophages5|Macrophages5	ALOX5_ALOX5AP	FALSE	FALSE	FALSE	1.358	0.003	0.438
Macrophages5|cDC2_4	ALOX5_ALOX5AP	FALSE	FALSE	FALSE	2.073	0	0.438
cDC2_4|Macrophages3	ALOX5_ALOX5AP	FALSE	FALSE	FALSE	1.2	0.006	0.438
cDC2_4|Macrophages5	ALOX5_ALOX5AP	FALSE	FALSE	FALSE	1.627	0	0.438
cDC2_4|cDC2_4	ALOX5_ALOX5AP	FALSE	FALSE	FALSE	2.342	0	0.438
Macrophages3|Macrophages3	CCL3_CCR1	TRUE	FALSE	TRUE	0.883	0	0.438
Macrophages3|Macrophages5	CCL3_CCR1	TRUE	FALSE	TRUE	0.656	0	0.438
Macrophages5|Macrophages3	CCL3_CCR1	TRUE	FALSE	TRUE	1.091	0	0.438
Macrophages5|Macrophages5	CCL3_CCR1	TRUE	FALSE	TRUE	0.864	0	0.438
Macrophages5|cDC2_4	CCL3_CCR1	TRUE	FALSE	TRUE	0.635	0.003	0.438
TCells|Macrophages3	CCL3_CCR1	TRUE	FALSE	TRUE	0.725	0	0.438
cDC2_4|Macrophages3	CCL3_CCR1	TRUE	FALSE	TRUE	0.76	0	0.438
Macrophages3|Macrophages3	SPN_SIGLEC1	TRUE	FALSE	FALSE	0.557	0	0.438
Macrophages5|Macrophages3	SPN_SIGLEC1	TRUE	FALSE	FALSE	0.541	0	0.438
TCells|Macrophages3	SPN_SIGLEC1	TRUE	FALSE	FALSE	0.633	0	0.438
TCells|Macrophages5	SPN_SIGLEC1	TRUE	FALSE	FALSE	0.523	0	0.438
cDC2_4|Macrophages3	SPN_SIGLEC1	TRUE	FALSE	FALSE	0.851	0	0.438
cDC2_4|Macrophages5	SPN_SIGLEC1	TRUE	FALSE	FALSE	0.742	0	0.438
cDC2_4|cDC2_4	SPN_SIGLEC1	TRUE	FALSE	FALSE	0.555	0	0.438
Macrophages3|Macrophages3	CD1D_LILRB2	FALSE	FALSE	TRUE	0.187	0.003	0.438
Macrophages3|Macrophages5	CD1D_LILRB2	FALSE	FALSE	TRUE	0.197	0	0.438
Macrophages5|Macrophages3	CD1D_LILRB2	FALSE	FALSE	TRUE	0.201	0	0.438
Macrophages5|Macrophages5	CD1D_LILRB2	FALSE	FALSE	TRUE	0.211	0	0.438
cDC2_4|Macrophages3	CD1D_LILRB2	FALSE	FALSE	TRUE	0.366	0	0.438
cDC2_4|Macrophages5	CD1D_LILRB2	FALSE	FALSE	TRUE	0.376	0	0.438
cDC2_4|cDC2_4	CD1D_LILRB2	FALSE	FALSE	TRUE	0.245	0	0.438
Macrophages3|Macrophages3	CCR1_CCL13	TRUE	TRUE	FALSE	1.494	0	0.438
Macrophages3|Macrophages5	CCR1_CCL13	TRUE	TRUE	FALSE	1.065	0	0.438
Macrophages3|cDC2_4	CCR1_CCL13	TRUE	TRUE	FALSE	0.58	0.03	0.438
Macrophages5|Macrophages3	CCR1_CCL13	TRUE	TRUE	FALSE	1.267	0	0.438
Macrophages5|Macrophages5	CCR1_CCL13	TRUE	TRUE	FALSE	0.838	0	0.438
cDC2_4|Macrophages3	CCR1_CCL13	TRUE	TRUE	FALSE	1.039	0	0.438
cDC2_4|Macrophages5	CCR1_CCL13	TRUE	TRUE	FALSE	0.609	0.036	0.438
Macrophages3|Macrophages3	NRP1_VEGFA	TRUE	TRUE	FALSE	0.553	0	0.5
Macrophages3|Macrophages5	NRP1_VEGFA	TRUE	TRUE	FALSE	0.559	0	0.5
Macrophages3|TCells	NRP1_VEGFA	TRUE	TRUE	FALSE	0.656	0	0.5
Macrophages3|cDC2_4	NRP1_VEGFA	TRUE	TRUE	FALSE	0.573	0	0.5
Macrophages5|Macrophages3	NRP1_VEGFA	TRUE	TRUE	FALSE	0.611	0	0.5
Macrophages5|Macrophages5	NRP1_VEGFA	TRUE	TRUE	FALSE	0.617	0	0.5
Macrophages5|TCells	NRP1_VEGFA	TRUE	TRUE	FALSE	0.713	0	0.5
Macrophages5|cDC2_4	NRP1_VEGFA	TRUE	TRUE	FALSE	0.631	0	0.5
Macrophages3|Macrophages5	PLXNB2_SEMA4C	FALSE	TRUE	TRUE	0.212	0.03	0.5
Macrophages3|cDC2_4	PLXNB2_SEMA4C	FALSE	TRUE	TRUE	0.287	0	0.5
Macrophages5|Macrophages3	PLXNB2_SEMA4C	FALSE	TRUE	TRUE	0.247	0	0.5
Macrophages5|Macrophages5	PLXNB2_SEMA4C	FALSE	TRUE	TRUE	0.274	0	0.5
Macrophages5|cDC2_4	PLXNB2_SEMA4C	FALSE	TRUE	TRUE	0.349	0	0.5
TCells|cDC2_4	PLXNB2_SEMA4C	FALSE	TRUE	TRUE	0.188	0.027	0.5
cDC2_4|Macrophages5	PLXNB2_SEMA4C	FALSE	TRUE	TRUE	0.219	0.012	0.5
cDC2_4|cDC2_4	PLXNB2_SEMA4C	FALSE	TRUE	TRUE	0.294	0	0.5
Macrophages3|Macrophages3	SPP1_PTGER4	TRUE	FALSE	TRUE	0.667	0	0.5
Macrophages3|Macrophages5	SPP1_PTGER4	TRUE	FALSE	TRUE	0.737	0	0.5
Macrophages3|TCells	SPP1_PTGER4	TRUE	FALSE	TRUE	0.698	0	0.5
Macrophages3|cDC2_4	SPP1_PTGER4	TRUE	FALSE	TRUE	0.671	0	0.5
Macrophages5|Macrophages3	SPP1_PTGER4	TRUE	FALSE	TRUE	0.836	0	0.5
Macrophages5|Macrophages5	SPP1_PTGER4	TRUE	FALSE	TRUE	0.906	0	0.5
Macrophages5|TCells	SPP1_PTGER4	TRUE	FALSE	TRUE	0.866	0	0.5
Macrophages5|cDC2_4	SPP1_PTGER4	TRUE	FALSE	TRUE	0.84	0	0.5
Macrophages3|Macrophages3	COPA_P2RY6	TRUE	FALSE	TRUE	0.427	0	0.5
Macrophages3|Macrophages5	COPA_P2RY6	TRUE	FALSE	TRUE	0.392	0.012	0.5
Macrophages3|cDC2_4	COPA_P2RY6	TRUE	FALSE	TRUE	0.588	0	0.5
Macrophages5|Macrophages3	COPA_P2RY6	TRUE	FALSE	TRUE	0.428	0	0.5
Macrophages5|Macrophages5	COPA_P2RY6	TRUE	FALSE	TRUE	0.393	0.024	0.5
Macrophages5|cDC2_4	COPA_P2RY6	TRUE	FALSE	TRUE	0.589	0	0.5
TCells|cDC2_4	COPA_P2RY6	TRUE	FALSE	TRUE	0.511	0	0.5
cDC2_4|cDC2_4	COPA_P2RY6	TRUE	FALSE	TRUE	0.532	0	0.5
Macrophages3|Macrophages3	AXL_GAS6	TRUE	TRUE	FALSE	0.526	0	0.5
Macrophages3|Macrophages5	AXL_GAS6	TRUE	TRUE	FALSE	0.474	0	0.5
Macrophages5|Macrophages3	AXL_GAS6	TRUE	TRUE	FALSE	0.466	0	0.5
Macrophages5|Macrophages5	AXL_GAS6	TRUE	TRUE	FALSE	0.414	0.021	0.5
cDC2_4|Macrophages3	AXL_GAS6	TRUE	TRUE	FALSE	0.803	0	0.5
cDC2_4|Macrophages5	AXL_GAS6	TRUE	TRUE	FALSE	0.751	0	0.5
cDC2_4|TCells	AXL_GAS6	TRUE	TRUE	FALSE	0.589	0	0.5
cDC2_4|cDC2_4	AXL_GAS6	TRUE	TRUE	FALSE	0.638	0	0.5
Macrophages3|Macrophages3	PTPRC_MRC1	FALSE	FALSE	TRUE	2.282	0	0.5
Macrophages3|Macrophages5	PTPRC_MRC1	FALSE	FALSE	TRUE	2.192	0	0.5
Macrophages5|Macrophages3	PTPRC_MRC1	FALSE	FALSE	TRUE	2.487	0	0.5
Macrophages5|Macrophages5	PTPRC_MRC1	FALSE	FALSE	TRUE	2.397	0	0.5
TCells|Macrophages3	PTPRC_MRC1	FALSE	FALSE	TRUE	2.532	0	0.5
TCells|Macrophages5	PTPRC_MRC1	FALSE	FALSE	TRUE	2.442	0	0.5
cDC2_4|Macrophages3	PTPRC_MRC1	FALSE	FALSE	TRUE	2.64	0	0.5
cDC2_4|Macrophages5	PTPRC_MRC1	FALSE	FALSE	TRUE	2.55	0	0.5
Macrophages3|Macrophages3	LGALS9_LRP1	TRUE	FALSE	TRUE	1.01	0	0.5
Macrophages3|Macrophages5	LGALS9_LRP1	TRUE	FALSE	TRUE	1.065	0	0.5
Macrophages3|cDC2_4	LGALS9_LRP1	TRUE	FALSE	TRUE	0.651	0	0.5
Macrophages5|Macrophages3	LGALS9_LRP1	TRUE	FALSE	TRUE	0.882	0	0.5
Macrophages5|Macrophages5	LGALS9_LRP1	TRUE	FALSE	TRUE	0.937	0	0.5
TCells|Macrophages5	LGALS9_LRP1	TRUE	FALSE	TRUE	0.617	0.012	0.5
cDC2_4|Macrophages3	LGALS9_LRP1	TRUE	FALSE	TRUE	0.912	0	0.5
cDC2_4|Macrophages5	LGALS9_LRP1	TRUE	FALSE	TRUE	0.967	0	0.5
Macrophages3|Macrophages3	SPP1_CD44	TRUE	FALSE	TRUE	1.232	0	0.5
Macrophages3|Macrophages5	SPP1_CD44	TRUE	FALSE	TRUE	1.274	0	0.5
Macrophages3|TCells	SPP1_CD44	TRUE	FALSE	TRUE	1.047	0	0.5
Macrophages3|cDC2_4	SPP1_CD44	TRUE	FALSE	TRUE	1.081	0	0.5
Macrophages5|Macrophages3	SPP1_CD44	TRUE	FALSE	TRUE	1.401	0	0.5
Macrophages5|Macrophages5	SPP1_CD44	TRUE	FALSE	TRUE	1.443	0	0.5
Macrophages5|TCells	SPP1_CD44	TRUE	FALSE	TRUE	1.216	0	0.5
Macrophages5|cDC2_4	SPP1_CD44	TRUE	FALSE	TRUE	1.25	0	0.5
Macrophages3|Macrophages3	CD99_PILRA	TRUE	FALSE	TRUE	1.168	0	0.5
Macrophages3|Macrophages5	CD99_PILRA	TRUE	FALSE	TRUE	1.21	0	0.5
Macrophages5|Macrophages3	CD99_PILRA	TRUE	FALSE	TRUE	1.194	0	0.5
Macrophages5|Macrophages5	CD99_PILRA	TRUE	FALSE	TRUE	1.237	0	0.5
TCells|Macrophages3	CD99_PILRA	TRUE	FALSE	TRUE	1.074	0	0.5
TCells|Macrophages5	CD99_PILRA	TRUE	FALSE	TRUE	1.116	0	0.5
cDC2_4|Macrophages3	CD99_PILRA	TRUE	FALSE	TRUE	0.809	0.027	0.5
cDC2_4|Macrophages5	CD99_PILRA	TRUE	FALSE	TRUE	0.851	0.018	0.5
Macrophages3|Macrophages3	NRP2_VEGFA	TRUE	TRUE	FALSE	0.459	0	0.5
Macrophages3|Macrophages5	NRP2_VEGFA	TRUE	TRUE	FALSE	0.465	0	0.5
Macrophages3|TCells	NRP2_VEGFA	TRUE	TRUE	FALSE	0.561	0	0.5
Macrophages3|cDC2_4	NRP2_VEGFA	TRUE	TRUE	FALSE	0.479	0	0.5
Macrophages5|Macrophages3	NRP2_VEGFA	TRUE	TRUE	FALSE	0.401	0.014	0.5
Macrophages5|Macrophages5	NRP2_VEGFA	TRUE	TRUE	FALSE	0.407	0.014	0.5
Macrophages5|TCells	NRP2_VEGFA	TRUE	TRUE	FALSE	0.503	0	0.5
Macrophages5|cDC2_4	NRP2_VEGFA	TRUE	TRUE	FALSE	0.421	0	0.5
Macrophages3|TCells	LTBR_LTB	FALSE	TRUE	FALSE	0.99	0	0.5
Macrophages3|cDC2_4	LTBR_LTB	FALSE	TRUE	FALSE	0.929	0	0.5
Macrophages5|TCells	LTBR_LTB	FALSE	TRUE	FALSE	1.03	0	0.5
Macrophages5|cDC2_4	LTBR_LTB	FALSE	TRUE	FALSE	0.969	0	0.5
TCells|TCells	LTBR_LTB	FALSE	TRUE	FALSE	0.878	0	0.5
TCells|cDC2_4	LTBR_LTB	FALSE	TRUE	FALSE	0.817	0.024	0.5
cDC2_4|TCells	LTBR_LTB	FALSE	TRUE	FALSE	0.981	0	0.5
cDC2_4|cDC2_4	LTBR_LTB	FALSE	TRUE	FALSE	0.92	0	0.5
Macrophages3|Macrophages3	LGALS9_DAG1	TRUE	FALSE	TRUE	0.617	0	0.562
Macrophages3|TCells	LGALS9_DAG1	TRUE	FALSE	TRUE	0.638	0	0.562
Macrophages3|cDC2_4	LGALS9_DAG1	TRUE	FALSE	TRUE	0.622	0	0.562
Macrophages5|Macrophages3	LGALS9_DAG1	TRUE	FALSE	TRUE	0.489	0	0.562
Macrophages5|TCells	LGALS9_DAG1	TRUE	FALSE	TRUE	0.509	0	0.562
Macrophages5|cDC2_4	LGALS9_DAG1	TRUE	FALSE	TRUE	0.493	0	0.562
cDC2_4|Macrophages3	LGALS9_DAG1	TRUE	FALSE	TRUE	0.52	0	0.562
cDC2_4|TCells	LGALS9_DAG1	TRUE	FALSE	TRUE	0.54	0	0.562
cDC2_4|cDC2_4	LGALS9_DAG1	TRUE	FALSE	TRUE	0.524	0	0.562
Macrophages3|Macrophages3	ADORA3_ENTPD1	FALSE	TRUE	FALSE	0.4	0.018	0.562
Macrophages3|Macrophages5	ADORA3_ENTPD1	FALSE	TRUE	FALSE	0.477	0	0.562
Macrophages3|TCells	ADORA3_ENTPD1	FALSE	TRUE	FALSE	0.364	0.05	0.562
Macrophages3|cDC2_4	ADORA3_ENTPD1	FALSE	TRUE	FALSE	0.679	0	0.562
Macrophages5|Macrophages3	ADORA3_ENTPD1	FALSE	TRUE	FALSE	0.524	0	0.562
Macrophages5|Macrophages5	ADORA3_ENTPD1	FALSE	TRUE	FALSE	0.601	0	0.562
Macrophages5|TCells	ADORA3_ENTPD1	FALSE	TRUE	FALSE	0.489	0	0.562
Macrophages5|cDC2_4	ADORA3_ENTPD1	FALSE	TRUE	FALSE	0.803	0	0.562
cDC2_4|cDC2_4	ADORA3_ENTPD1	FALSE	TRUE	FALSE	0.488	0	0.562
Macrophages3|Macrophages3	NAMPT_P2RY6	TRUE	FALSE	TRUE	0.464	0	0.562
Macrophages3|Macrophages5	NAMPT_P2RY6	TRUE	FALSE	TRUE	0.429	0.03	0.562
Macrophages3|cDC2_4	NAMPT_P2RY6	TRUE	FALSE	TRUE	0.624	0	0.562
Macrophages5|Macrophages3	NAMPT_P2RY6	TRUE	FALSE	TRUE	0.51	0	0.562
Macrophages5|Macrophages5	NAMPT_P2RY6	TRUE	FALSE	TRUE	0.475	0.006	0.562
Macrophages5|cDC2_4	NAMPT_P2RY6	TRUE	FALSE	TRUE	0.671	0	0.562
TCells|Macrophages3	NAMPT_P2RY6	TRUE	FALSE	TRUE	0.406	0.024	0.562
TCells|cDC2_4	NAMPT_P2RY6	TRUE	FALSE	TRUE	0.567	0	0.562
cDC2_4|cDC2_4	NAMPT_P2RY6	TRUE	FALSE	TRUE	0.475	0	0.562
Macrophages3|Macrophages3	MERTK_GAS6	TRUE	TRUE	FALSE	0.536	0	0.562
Macrophages3|Macrophages5	MERTK_GAS6	TRUE	TRUE	FALSE	0.484	0	0.562
Macrophages3|TCells	MERTK_GAS6	TRUE	TRUE	FALSE	0.323	0.006	0.562
Macrophages3|cDC2_4	MERTK_GAS6	TRUE	TRUE	FALSE	0.372	0.003	0.562
Macrophages5|Macrophages3	MERTK_GAS6	TRUE	TRUE	FALSE	0.635	0	0.562
Macrophages5|Macrophages5	MERTK_GAS6	TRUE	TRUE	FALSE	0.583	0	0.562
Macrophages5|TCells	MERTK_GAS6	TRUE	TRUE	FALSE	0.422	0	0.562
Macrophages5|cDC2_4	MERTK_GAS6	TRUE	TRUE	FALSE	0.471	0	0.562
cDC2_4|Macrophages3	MERTK_GAS6	TRUE	TRUE	FALSE	0.329	0.026	0.562
Macrophages3|Macrophages3	TNFSF13_TNFRSF1A	TRUE	FALSE	TRUE	0.43	0	0.562
Macrophages3|Macrophages5	TNFSF13_TNFRSF1A	TRUE	FALSE	TRUE	0.493	0	0.562
Macrophages3|cDC2_4	TNFSF13_TNFRSF1A	TRUE	FALSE	TRUE	0.405	0	0.562
Macrophages5|Macrophages3	TNFSF13_TNFRSF1A	TRUE	FALSE	TRUE	0.46	0	0.562
Macrophages5|Macrophages5	TNFSF13_TNFRSF1A	TRUE	FALSE	TRUE	0.523	0	0.562
Macrophages5|cDC2_4	TNFSF13_TNFRSF1A	TRUE	FALSE	TRUE	0.435	0	0.562
cDC2_4|Macrophages3	TNFSF13_TNFRSF1A	TRUE	FALSE	TRUE	0.426	0	0.562
cDC2_4|Macrophages5	TNFSF13_TNFRSF1A	TRUE	FALSE	TRUE	0.49	0	0.562
cDC2_4|cDC2_4	TNFSF13_TNFRSF1A	TRUE	FALSE	TRUE	0.402	0.003	0.562
Macrophages3|Macrophages3	ANXA1_FPR1	TRUE	FALSE	TRUE	1.045	0.003	0.625
Macrophages3|Macrophages5	ANXA1_FPR1	TRUE	FALSE	TRUE	1.098	0	0.625
Macrophages3|cDC2_4	ANXA1_FPR1	TRUE	FALSE	TRUE	1.58	0	0.625
Macrophages5|Macrophages3	ANXA1_FPR1	TRUE	FALSE	TRUE	1.132	0	0.625
Macrophages5|Macrophages5	ANXA1_FPR1	TRUE	FALSE	TRUE	1.185	0	0.625
Macrophages5|cDC2_4	ANXA1_FPR1	TRUE	FALSE	TRUE	1.667	0	0.625
TCells|cDC2_4	ANXA1_FPR1	TRUE	FALSE	TRUE	1.152	0	0.625
cDC2_4|Macrophages3	ANXA1_FPR1	TRUE	FALSE	TRUE	1.104	0	0.625
cDC2_4|Macrophages5	ANXA1_FPR1	TRUE	FALSE	TRUE	1.157	0	0.625
cDC2_4|cDC2_4	ANXA1_FPR1	TRUE	FALSE	TRUE	1.639	0	0.625
Macrophages3|Macrophages3	COPA_SORT1	TRUE	FALSE	TRUE	0.443	0	0.625
Macrophages3|Macrophages5	COPA_SORT1	TRUE	FALSE	TRUE	0.493	0	0.625
Macrophages3|cDC2_4	COPA_SORT1	TRUE	FALSE	TRUE	0.486	0	0.625
Macrophages5|Macrophages3	COPA_SORT1	TRUE	FALSE	TRUE	0.444	0.018	0.625
Macrophages5|Macrophages5	COPA_SORT1	TRUE	FALSE	TRUE	0.494	0	0.625
Macrophages5|cDC2_4	COPA_SORT1	TRUE	FALSE	TRUE	0.487	0	0.625
TCells|Macrophages5	COPA_SORT1	TRUE	FALSE	TRUE	0.417	0.036	0.625
TCells|cDC2_4	COPA_SORT1	TRUE	FALSE	TRUE	0.409	0.039	0.625
cDC2_4|Macrophages5	COPA_SORT1	TRUE	FALSE	TRUE	0.438	0.021	0.625
cDC2_4|cDC2_4	COPA_SORT1	TRUE	FALSE	TRUE	0.43	0.036	0.625
Macrophages3|Macrophages3	LGALS9_CD44	TRUE	FALSE	TRUE	1.272	0	0.625
Macrophages3|Macrophages5	LGALS9_CD44	TRUE	FALSE	TRUE	1.313	0	0.625
Macrophages3|TCells	LGALS9_CD44	TRUE	FALSE	TRUE	1.087	0	0.625
Macrophages3|cDC2_4	LGALS9_CD44	TRUE	FALSE	TRUE	1.121	0	0.625
Macrophages5|Macrophages3	LGALS9_CD44	TRUE	FALSE	TRUE	1.143	0	0.625
Macrophages5|Macrophages5	LGALS9_CD44	TRUE	FALSE	TRUE	1.185	0	0.625
cDC2_4|Macrophages3	LGALS9_CD44	TRUE	FALSE	TRUE	1.174	0	0.625
cDC2_4|Macrophages5	LGALS9_CD44	TRUE	FALSE	TRUE	1.216	0	0.625
cDC2_4|TCells	LGALS9_CD44	TRUE	FALSE	TRUE	0.989	0.024	0.625
cDC2_4|cDC2_4	LGALS9_CD44	TRUE	FALSE	TRUE	1.023	0.033	0.625
Macrophages3|Macrophages3	LGALS9_HAVCR2	TRUE	FALSE	TRUE	1.054	0	0.625
Macrophages3|Macrophages5	LGALS9_HAVCR2	TRUE	FALSE	TRUE	0.979	0	0.625
Macrophages3|TCells	LGALS9_HAVCR2	TRUE	FALSE	TRUE	0.722	0	0.625
Macrophages3|cDC2_4	LGALS9_HAVCR2	TRUE	FALSE	TRUE	0.891	0	0.625
Macrophages5|Macrophages3	LGALS9_HAVCR2	TRUE	FALSE	TRUE	0.926	0	0.625
Macrophages5|Macrophages5	LGALS9_HAVCR2	TRUE	FALSE	TRUE	0.851	0	0.625
Macrophages5|cDC2_4	LGALS9_HAVCR2	TRUE	FALSE	TRUE	0.763	0	0.625
cDC2_4|Macrophages3	LGALS9_HAVCR2	TRUE	FALSE	TRUE	0.956	0	0.625
cDC2_4|Macrophages5	LGALS9_HAVCR2	TRUE	FALSE	TRUE	0.881	0	0.625
cDC2_4|cDC2_4	LGALS9_HAVCR2	TRUE	FALSE	TRUE	0.794	0	0.625
Macrophages3|Macrophages3	TGFB1_TGFbeta receptor1	TRUE	FALSE	TRUE	0.514	0.009	0.625
Macrophages3|Macrophages5	TGFB1_TGFbeta receptor1	TRUE	FALSE	TRUE	0.58	0	0.625
Macrophages3|cDC2_4	TGFB1_TGFbeta receptor1	TRUE	FALSE	TRUE	0.52	0.009	0.625
Macrophages5|Macrophages3	TGFB1_TGFbeta receptor1	TRUE	FALSE	TRUE	0.573	0	0.625
Macrophages5|Macrophages5	TGFB1_TGFbeta receptor1	TRUE	FALSE	TRUE	0.638	0	0.625
Macrophages5|cDC2_4	TGFB1_TGFbeta receptor1	TRUE	FALSE	TRUE	0.578	0	0.625
TCells|Macrophages5	TGFB1_TGFbeta receptor1	TRUE	FALSE	TRUE	0.524	0	0.625
cDC2_4|Macrophages3	TGFB1_TGFbeta receptor1	TRUE	FALSE	TRUE	0.535	0.009	0.625
cDC2_4|Macrophages5	TGFB1_TGFbeta receptor1	TRUE	FALSE	TRUE	0.601	0	0.625
cDC2_4|cDC2_4	TGFB1_TGFbeta receptor1	TRUE	FALSE	TRUE	0.541	0.003	0.625
Macrophages3|Macrophages3	HLA-DPB1_TNFSF13B	TRUE	TRUE	FALSE	2.091	0	0.688
Macrophages3|Macrophages5	HLA-DPB1_TNFSF13B	TRUE	TRUE	FALSE	2.203	0	0.688
Macrophages3|cDC2_4	HLA-DPB1_TNFSF13B	TRUE	TRUE	FALSE	2.077	0	0.688
Macrophages5|Macrophages3	HLA-DPB1_TNFSF13B	TRUE	TRUE	FALSE	2.436	0	0.688
Macrophages5|Macrophages5	HLA-DPB1_TNFSF13B	TRUE	TRUE	FALSE	2.548	0	0.688
Macrophages5|TCells	HLA-DPB1_TNFSF13B	TRUE	TRUE	FALSE	2.016	0	0.688
Macrophages5|cDC2_4	HLA-DPB1_TNFSF13B	TRUE	TRUE	FALSE	2.422	0	0.688
cDC2_4|Macrophages3	HLA-DPB1_TNFSF13B	TRUE	TRUE	FALSE	2.683	0	0.688
cDC2_4|Macrophages5	HLA-DPB1_TNFSF13B	TRUE	TRUE	FALSE	2.795	0	0.688
cDC2_4|TCells	HLA-DPB1_TNFSF13B	TRUE	TRUE	FALSE	2.263	0	0.688
cDC2_4|cDC2_4	HLA-DPB1_TNFSF13B	TRUE	TRUE	FALSE	2.669	0	0.688
Macrophages3|Macrophages3	TFRC_TNFSF13B	TRUE	TRUE	FALSE	0.661	0	0.688
Macrophages3|Macrophages5	TFRC_TNFSF13B	TRUE	TRUE	FALSE	0.773	0	0.688
Macrophages3|cDC2_4	TFRC_TNFSF13B	TRUE	TRUE	FALSE	0.647	0	0.688
Macrophages5|Macrophages3	TFRC_TNFSF13B	TRUE	TRUE	FALSE	0.542	0.018	0.688
Macrophages5|Macrophages5	TFRC_TNFSF13B	TRUE	TRUE	FALSE	0.654	0	0.688
TCells|Macrophages3	TFRC_TNFSF13B	TRUE	TRUE	FALSE	0.66	0	0.688
TCells|Macrophages5	TFRC_TNFSF13B	TRUE	TRUE	FALSE	0.772	0	0.688
TCells|cDC2_4	TFRC_TNFSF13B	TRUE	TRUE	FALSE	0.647	0	0.688
cDC2_4|Macrophages3	TFRC_TNFSF13B	TRUE	TRUE	FALSE	0.588	0	0.688
cDC2_4|Macrophages5	TFRC_TNFSF13B	TRUE	TRUE	FALSE	0.701	0	0.688
cDC2_4|cDC2_4	TFRC_TNFSF13B	TRUE	TRUE	FALSE	0.575	0.003	0.688
Macrophages3|Macrophages3	ANXA1_FPR3	TRUE	FALSE	TRUE	1.486	0	0.688
Macrophages3|Macrophages5	ANXA1_FPR3	TRUE	FALSE	TRUE	1.459	0	0.688
Macrophages3|cDC2_4	ANXA1_FPR3	TRUE	FALSE	TRUE	1.326	0	0.688
Macrophages5|Macrophages3	ANXA1_FPR3	TRUE	FALSE	TRUE	1.573	0	0.688
Macrophages5|Macrophages5	ANXA1_FPR3	TRUE	FALSE	TRUE	1.547	0	0.688
Macrophages5|cDC2_4	ANXA1_FPR3	TRUE	FALSE	TRUE	1.414	0	0.688
TCells|Macrophages3	ANXA1_FPR3	TRUE	FALSE	TRUE	1.058	0.003	0.688
TCells|Macrophages5	ANXA1_FPR3	TRUE	FALSE	TRUE	1.032	0.021	0.688
cDC2_4|Macrophages3	ANXA1_FPR3	TRUE	FALSE	TRUE	1.545	0	0.688
cDC2_4|Macrophages5	ANXA1_FPR3	TRUE	FALSE	TRUE	1.519	0	0.688
cDC2_4|cDC2_4	ANXA1_FPR3	TRUE	FALSE	TRUE	1.385	0	0.688
Macrophages3|Macrophages3	SIRPA_CD47	FALSE	TRUE	TRUE	0.984	0	0.688
Macrophages3|Macrophages5	SIRPA_CD47	FALSE	TRUE	TRUE	0.927	0	0.688
Macrophages3|TCells	SIRPA_CD47	FALSE	TRUE	TRUE	0.897	0	0.688
Macrophages3|cDC2_4	SIRPA_CD47	FALSE	TRUE	TRUE	0.943	0	0.688
Macrophages5|Macrophages3	SIRPA_CD47	FALSE	TRUE	TRUE	0.853	0	0.688
Macrophages5|Macrophages5	SIRPA_CD47	FALSE	TRUE	TRUE	0.796	0	0.688
Macrophages5|TCells	SIRPA_CD47	FALSE	TRUE	TRUE	0.766	0	0.688
Macrophages5|cDC2_4	SIRPA_CD47	FALSE	TRUE	TRUE	0.811	0	0.688
cDC2_4|Macrophages3	SIRPA_CD47	FALSE	TRUE	TRUE	0.754	0.003	0.688
cDC2_4|Macrophages5	SIRPA_CD47	FALSE	TRUE	TRUE	0.697	0.042	0.688
cDC2_4|cDC2_4	SIRPA_CD47	FALSE	TRUE	TRUE	0.713	0.024	0.688
Macrophages3|Macrophages3	LGALS9_SORL1	TRUE	FALSE	TRUE	0.727	0	0.75
Macrophages3|Macrophages5	LGALS9_SORL1	TRUE	FALSE	TRUE	0.954	0	0.75
Macrophages3|TCells	LGALS9_SORL1	TRUE	FALSE	TRUE	0.712	0	0.75
Macrophages3|cDC2_4	LGALS9_SORL1	TRUE	FALSE	TRUE	0.736	0	0.75
Macrophages5|Macrophages3	LGALS9_SORL1	TRUE	FALSE	TRUE	0.599	0.015	0.75
Macrophages5|Macrophages5	LGALS9_SORL1	TRUE	FALSE	TRUE	0.825	0	0.75
Macrophages5|TCells	LGALS9_SORL1	TRUE	FALSE	TRUE	0.584	0.05	0.75
Macrophages5|cDC2_4	LGALS9_SORL1	TRUE	FALSE	TRUE	0.608	0.03	0.75
cDC2_4|Macrophages3	LGALS9_SORL1	TRUE	FALSE	TRUE	0.63	0.003	0.75
cDC2_4|Macrophages5	LGALS9_SORL1	TRUE	FALSE	TRUE	0.856	0	0.75
cDC2_4|TCells	LGALS9_SORL1	TRUE	FALSE	TRUE	0.615	0	0.75
cDC2_4|cDC2_4	LGALS9_SORL1	TRUE	FALSE	TRUE	0.638	0	0.75
Macrophages3|Macrophages3	LGALS9_SLC1A5	TRUE	FALSE	TRUE	0.687	0	0.75
Macrophages3|Macrophages5	LGALS9_SLC1A5	TRUE	FALSE	TRUE	0.733	0	0.75
Macrophages3|TCells	LGALS9_SLC1A5	TRUE	FALSE	TRUE	0.675	0	0.75
Macrophages3|cDC2_4	LGALS9_SLC1A5	TRUE	FALSE	TRUE	0.737	0	0.75
Macrophages5|Macrophages3	LGALS9_SLC1A5	TRUE	FALSE	TRUE	0.559	0	0.75
Macrophages5|Macrophages5	LGALS9_SLC1A5	TRUE	FALSE	TRUE	0.605	0	0.75
Macrophages5|TCells	LGALS9_SLC1A5	TRUE	FALSE	TRUE	0.547	0.003	0.75
Macrophages5|cDC2_4	LGALS9_SLC1A5	TRUE	FALSE	TRUE	0.608	0	0.75
cDC2_4|Macrophages3	LGALS9_SLC1A5	TRUE	FALSE	TRUE	0.589	0	0.75
cDC2_4|Macrophages5	LGALS9_SLC1A5	TRUE	FALSE	TRUE	0.636	0	0.75
cDC2_4|TCells	LGALS9_SLC1A5	TRUE	FALSE	TRUE	0.577	0	0.75
cDC2_4|cDC2_4	LGALS9_SLC1A5	TRUE	FALSE	TRUE	0.639	0	0.75
Macrophages3|Macrophages3	LGALS9_CD47	TRUE	FALSE	TRUE	1.037	0	0.75
Macrophages3|Macrophages5	LGALS9_CD47	TRUE	FALSE	TRUE	0.981	0	0.75
Macrophages3|TCells	LGALS9_CD47	TRUE	FALSE	TRUE	0.951	0	0.75
Macrophages3|cDC2_4	LGALS9_CD47	TRUE	FALSE	TRUE	0.996	0	0.75
Macrophages5|Macrophages3	LGALS9_CD47	TRUE	FALSE	TRUE	0.909	0	0.75
Macrophages5|Macrophages5	LGALS9_CD47	TRUE	FALSE	TRUE	0.852	0.011	0.75
Macrophages5|TCells	LGALS9_CD47	TRUE	FALSE	TRUE	0.822	0.021	0.75
Macrophages5|cDC2_4	LGALS9_CD47	TRUE	FALSE	TRUE	0.868	0	0.75
cDC2_4|Macrophages3	LGALS9_CD47	TRUE	FALSE	TRUE	0.94	0	0.75
cDC2_4|Macrophages5	LGALS9_CD47	TRUE	FALSE	TRUE	0.883	0	0.75
cDC2_4|TCells	LGALS9_CD47	TRUE	FALSE	TRUE	0.853	0	0.75
cDC2_4|cDC2_4	LGALS9_CD47	TRUE	FALSE	TRUE	0.898	0	0.75
Macrophages3|Macrophages3	LGALS9_MET	TRUE	FALSE	TRUE	0.626	0	0.75
Macrophages3|Macrophages5	LGALS9_MET	TRUE	FALSE	TRUE	0.624	0	0.75
Macrophages3|TCells	LGALS9_MET	TRUE	FALSE	TRUE	0.669	0	0.75
Macrophages3|cDC2_4	LGALS9_MET	TRUE	FALSE	TRUE	0.618	0	0.75
Macrophages5|Macrophages3	LGALS9_MET	TRUE	FALSE	TRUE	0.498	0.006	0.75
Macrophages5|Macrophages5	LGALS9_MET	TRUE	FALSE	TRUE	0.496	0.009	0.75
Macrophages5|TCells	LGALS9_MET	TRUE	FALSE	TRUE	0.54	0	0.75
Macrophages5|cDC2_4	LGALS9_MET	TRUE	FALSE	TRUE	0.489	0.02	0.75
cDC2_4|Macrophages3	LGALS9_MET	TRUE	FALSE	TRUE	0.528	0	0.75
cDC2_4|Macrophages5	LGALS9_MET	TRUE	FALSE	TRUE	0.526	0	0.75
cDC2_4|TCells	LGALS9_MET	TRUE	FALSE	TRUE	0.571	0	0.75
cDC2_4|cDC2_4	LGALS9_MET	TRUE	FALSE	TRUE	0.52	0	0.75
Macrophages3|Macrophages3	GRN_SORT1	TRUE	FALSE	TRUE	1.718	0	0.75
Macrophages3|Macrophages5	GRN_SORT1	TRUE	FALSE	TRUE	1.769	0	0.75
Macrophages3|TCells	GRN_SORT1	TRUE	FALSE	TRUE	1.597	0	0.75
Macrophages3|cDC2_4	GRN_SORT1	TRUE	FALSE	TRUE	1.761	0	0.75
Macrophages5|Macrophages3	GRN_SORT1	TRUE	FALSE	TRUE	1.528	0	0.75
Macrophages5|Macrophages5	GRN_SORT1	TRUE	FALSE	TRUE	1.579	0	0.75
Macrophages5|TCells	GRN_SORT1	TRUE	FALSE	TRUE	1.407	0	0.75
Macrophages5|cDC2_4	GRN_SORT1	TRUE	FALSE	TRUE	1.571	0	0.75
cDC2_4|Macrophages3	GRN_SORT1	TRUE	FALSE	TRUE	1.458	0	0.75
cDC2_4|Macrophages5	GRN_SORT1	TRUE	FALSE	TRUE	1.508	0	0.75
cDC2_4|TCells	GRN_SORT1	TRUE	FALSE	TRUE	1.337	0	0.75
cDC2_4|cDC2_4	GRN_SORT1	TRUE	FALSE	TRUE	1.501	0	0.75
Macrophages3|Macrophages3	CD74_APP	FALSE	TRUE	FALSE	2.865	0	0.75
Macrophages3|Macrophages5	CD74_APP	FALSE	TRUE	FALSE	2.802	0	0.75
Macrophages3|TCells	CD74_APP	FALSE	TRUE	FALSE	2.819	0	0.75
Macrophages3|cDC2_4	CD74_APP	FALSE	TRUE	FALSE	2.854	0	0.75
Macrophages5|Macrophages3	CD74_APP	FALSE	TRUE	FALSE	3.133	0	0.75
Macrophages5|Macrophages5	CD74_APP	FALSE	TRUE	FALSE	3.07	0	0.75
Macrophages5|TCells	CD74_APP	FALSE	TRUE	FALSE	3.086	0	0.75
Macrophages5|cDC2_4	CD74_APP	FALSE	TRUE	FALSE	3.121	0	0.75
cDC2_4|Macrophages3	CD74_APP	FALSE	TRUE	FALSE	3.252	0	0.75
cDC2_4|Macrophages5	CD74_APP	FALSE	TRUE	FALSE	3.189	0	0.75
cDC2_4|TCells	CD74_APP	FALSE	TRUE	FALSE	3.205	0	0.75
cDC2_4|cDC2_4	CD74_APP	FALSE	TRUE	FALSE	3.241	0	0.75
Macrophages3|Macrophages3	CD40_TNFSF13B	TRUE	TRUE	FALSE	0.675	0	0.75
Macrophages3|Macrophages5	CD40_TNFSF13B	TRUE	TRUE	FALSE	0.787	0	0.75
Macrophages3|cDC2_4	CD40_TNFSF13B	TRUE	TRUE	FALSE	0.661	0	0.75
Macrophages5|Macrophages3	CD40_TNFSF13B	TRUE	TRUE	FALSE	0.698	0	0.75
Macrophages5|Macrophages5	CD40_TNFSF13B	TRUE	TRUE	FALSE	0.81	0	0.75
Macrophages5|cDC2_4	CD40_TNFSF13B	TRUE	TRUE	FALSE	0.684	0	0.75
TCells|Macrophages3	CD40_TNFSF13B	TRUE	TRUE	FALSE	0.539	0.012	0.75
TCells|Macrophages5	CD40_TNFSF13B	TRUE	TRUE	FALSE	0.652	0	0.75
TCells|cDC2_4	CD40_TNFSF13B	TRUE	TRUE	FALSE	0.526	0.027	0.75
cDC2_4|Macrophages3	CD40_TNFSF13B	TRUE	TRUE	FALSE	0.842	0	0.75
cDC2_4|Macrophages5	CD40_TNFSF13B	TRUE	TRUE	FALSE	0.954	0	0.75
cDC2_4|cDC2_4	CD40_TNFSF13B	TRUE	TRUE	FALSE	0.828	0	0.75
Macrophages3|Macrophages3	FPR3_HEBP1	FALSE	TRUE	FALSE	1.051	0	0.75
Macrophages3|Macrophages5	FPR3_HEBP1	FALSE	TRUE	FALSE	0.891	0	0.75
Macrophages3|TCells	FPR3_HEBP1	FALSE	TRUE	FALSE	0.913	0	0.75
Macrophages3|cDC2_4	FPR3_HEBP1	FALSE	TRUE	FALSE	0.913	0	0.75
Macrophages5|Macrophages3	FPR3_HEBP1	FALSE	TRUE	FALSE	1.025	0	0.75
Macrophages5|Macrophages5	FPR3_HEBP1	FALSE	TRUE	FALSE	0.865	0	0.75
Macrophages5|TCells	FPR3_HEBP1	FALSE	TRUE	FALSE	0.886	0	0.75
Macrophages5|cDC2_4	FPR3_HEBP1	FALSE	TRUE	FALSE	0.887	0	0.75
cDC2_4|Macrophages3	FPR3_HEBP1	FALSE	TRUE	FALSE	0.891	0	0.75
cDC2_4|Macrophages5	FPR3_HEBP1	FALSE	TRUE	FALSE	0.732	0	0.75
cDC2_4|TCells	FPR3_HEBP1	FALSE	TRUE	FALSE	0.753	0	0.75
cDC2_4|cDC2_4	FPR3_HEBP1	FALSE	TRUE	FALSE	0.753	0	0.75
Macrophages3|Macrophages3	CD74_COPA	TRUE	TRUE	FALSE	2.739	0	0.75
Macrophages3|Macrophages5	CD74_COPA	TRUE	TRUE	FALSE	2.74	0	0.75
Macrophages3|TCells	CD74_COPA	TRUE	TRUE	FALSE	2.663	0	0.75
Macrophages3|cDC2_4	CD74_COPA	TRUE	TRUE	FALSE	2.684	0	0.75
Macrophages5|Macrophages3	CD74_COPA	TRUE	TRUE	FALSE	3.007	0	0.75
Macrophages5|Macrophages5	CD74_COPA	TRUE	TRUE	FALSE	3.008	0	0.75
Macrophages5|TCells	CD74_COPA	TRUE	TRUE	FALSE	2.93	0	0.75
Macrophages5|cDC2_4	CD74_COPA	TRUE	TRUE	FALSE	2.951	0	0.75
cDC2_4|Macrophages3	CD74_COPA	TRUE	TRUE	FALSE	3.126	0	0.75
cDC2_4|Macrophages5	CD74_COPA	TRUE	TRUE	FALSE	3.127	0	0.75
cDC2_4|TCells	CD74_COPA	TRUE	TRUE	FALSE	3.05	0	0.75
cDC2_4|cDC2_4	CD74_COPA	TRUE	TRUE	FALSE	3.071	0	0.75
Macrophages3|Macrophages3	TNFRSF1B_GRN	TRUE	TRUE	FALSE	1.727	0	0.75
Macrophages3|Macrophages5	TNFRSF1B_GRN	TRUE	TRUE	FALSE	1.537	0	0.75
Macrophages3|cDC2_4	TNFRSF1B_GRN	TRUE	TRUE	FALSE	1.467	0	0.75
Macrophages5|Macrophages3	TNFRSF1B_GRN	TRUE	TRUE	FALSE	1.845	0	0.75
Macrophages5|Macrophages5	TNFRSF1B_GRN	TRUE	TRUE	FALSE	1.655	0	0.75
Macrophages5|cDC2_4	TNFRSF1B_GRN	TRUE	TRUE	FALSE	1.585	0	0.75
TCells|Macrophages3	TNFRSF1B_GRN	TRUE	TRUE	FALSE	1.95	0	0.75
TCells|Macrophages5	TNFRSF1B_GRN	TRUE	TRUE	FALSE	1.76	0	0.75
TCells|cDC2_4	TNFRSF1B_GRN	TRUE	TRUE	FALSE	1.689	0	0.75
cDC2_4|Macrophages3	TNFRSF1B_GRN	TRUE	TRUE	FALSE	1.597	0	0.75
cDC2_4|Macrophages5	TNFRSF1B_GRN	TRUE	TRUE	FALSE	1.407	0.012	0.75
cDC2_4|cDC2_4	TNFRSF1B_GRN	TRUE	TRUE	FALSE	1.337	0.009	0.75
Macrophages3|Macrophages3	CD74_MIF	TRUE	TRUE	FALSE	2.616	0	0.75
Macrophages3|Macrophages5	CD74_MIF	TRUE	TRUE	FALSE	2.58	0	0.75
Macrophages3|TCells	CD74_MIF	TRUE	TRUE	FALSE	2.701	0	0.75
Macrophages3|cDC2_4	CD74_MIF	TRUE	TRUE	FALSE	2.645	0	0.75
Macrophages5|Macrophages3	CD74_MIF	TRUE	TRUE	FALSE	2.883	0	0.75
Macrophages5|Macrophages5	CD74_MIF	TRUE	TRUE	FALSE	2.848	0	0.75
Macrophages5|TCells	CD74_MIF	TRUE	TRUE	FALSE	2.968	0	0.75
Macrophages5|cDC2_4	CD74_MIF	TRUE	TRUE	FALSE	2.912	0	0.75
cDC2_4|Macrophages3	CD74_MIF	TRUE	TRUE	FALSE	3.003	0	0.75
cDC2_4|Macrophages5	CD74_MIF	TRUE	TRUE	FALSE	2.967	0	0.75
cDC2_4|TCells	CD74_MIF	TRUE	TRUE	FALSE	3.088	0	0.75
cDC2_4|cDC2_4	CD74_MIF	TRUE	TRUE	FALSE	3.032	0	0.75
Macrophages3|Macrophages3	TNFSF12_TNFRSF12A	TRUE	FALSE	TRUE	0.449	0.015	0.75
Macrophages3|Macrophages5	TNFSF12_TNFRSF12A	TRUE	FALSE	TRUE	0.455	0.03	0.75
Macrophages3|TCells	TNFSF12_TNFRSF12A	TRUE	FALSE	TRUE	0.47	0.003	0.75
Macrophages3|cDC2_4	TNFSF12_TNFRSF12A	TRUE	FALSE	TRUE	0.451	0.03	0.75
Macrophages5|Macrophages3	TNFSF12_TNFRSF12A	TRUE	FALSE	TRUE	0.502	0	0.75
Macrophages5|Macrophages5	TNFSF12_TNFRSF12A	TRUE	FALSE	TRUE	0.509	0	0.75
Macrophages5|TCells	TNFSF12_TNFRSF12A	TRUE	FALSE	TRUE	0.523	0.003	0.75
Macrophages5|cDC2_4	TNFSF12_TNFRSF12A	TRUE	FALSE	TRUE	0.504	0.003	0.75
cDC2_4|Macrophages3	TNFSF12_TNFRSF12A	TRUE	FALSE	TRUE	0.586	0	0.75
cDC2_4|Macrophages5	TNFSF12_TNFRSF12A	TRUE	FALSE	TRUE	0.593	0	0.75
cDC2_4|TCells	TNFSF12_TNFRSF12A	TRUE	FALSE	TRUE	0.607	0	0.75
cDC2_4|cDC2_4	TNFSF12_TNFRSF12A	TRUE	FALSE	TRUE	0.588	0	0.75
Macrophages3|Macrophages3	TNFRSF1A_GRN	TRUE	TRUE	FALSE	1.864	0	0.75
Macrophages3|Macrophages5	TNFRSF1A_GRN	TRUE	TRUE	FALSE	1.674	0	0.75
Macrophages3|cDC2_4	TNFRSF1A_GRN	TRUE	TRUE	FALSE	1.604	0	0.75
Macrophages5|Macrophages3	TNFRSF1A_GRN	TRUE	TRUE	FALSE	1.927	0	0.75
Macrophages5|Macrophages5	TNFRSF1A_GRN	TRUE	TRUE	FALSE	1.738	0	0.75
Macrophages5|cDC2_4	TNFRSF1A_GRN	TRUE	TRUE	FALSE	1.667	0	0.75
TCells|Macrophages3	TNFRSF1A_GRN	TRUE	TRUE	FALSE	1.622	0	0.75
TCells|Macrophages5	TNFRSF1A_GRN	TRUE	TRUE	FALSE	1.432	0	0.75
TCells|cDC2_4	TNFRSF1A_GRN	TRUE	TRUE	FALSE	1.362	0	0.75
cDC2_4|Macrophages3	TNFRSF1A_GRN	TRUE	TRUE	FALSE	1.839	0	0.75
cDC2_4|Macrophages5	TNFRSF1A_GRN	TRUE	TRUE	FALSE	1.65	0	0.75
cDC2_4|cDC2_4	TNFRSF1A_GRN	TRUE	TRUE	FALSE	1.579	0	0.75
